# Supplementary material for: Skeletal pathology and variable anatomy in elephant feet assessed using computed tomography
Source: PeerJ. 2017 Jan 18;5:e2877. doi: 10.7717/peerj.2877 (PMC5248576; doi:10.7717/peerj.2877)
Supplement: Data S1 — Sheet 1 is the raw collected data, sheet 2 contains a summary of the elephants, predigits, sesamoids and grade 2 + pathology, sheet 3 contains the raw data for misshapen or missing phalanges. [file peerj-05-2877-s001.xlsx]

## Sheet: Raw data from CT
Specimen	Digit	Location	Lesion (severity)	Add. Lesion (severity)	Add. Lesion (severity)	Add. Lesion (severity)	Comment
African 5 LF	1	CMc	6 (2)	3 (2)	8 (2)
African 5 LF	1	MC	1 (2)	8 (2)	4 (2)	6 (2)
African 5 LF	1	Ses	6 (2)	1 (1)			single
African 5 LF	1	MCP	6 (2)
African 5 LF	1	PP	0
African 5 LF	1	PIP	x
African 5 LF	1	MP	x
African 5 LF	1	DIP	x
African 5 LF	1	DP	x
African 5 LF	1	Sole	0
African 5 LF	1	Interdigital	0
African 5 LF	2	CMc	6 (3)	3 (2)	4 (2)
African 5 LF	2	MC	1 (1)	3 (1)	8 (2)	4 (2)
African 5 LF	2	Ses	3 (1)				pair
African 5 LF	2	MCP	6 (2)
African 5 LF	2	PP	4 (2)	8 (2)	3 (1)
African 5 LF	2	PIP	0
African 5 LF	2	MP	0
African 5 LF	2	DIP	x
African 5 LF	2	DP	x
African 5 LF	2	Sole	0
African 5 LF	2	Interdigital	0
African 5 LF	3	CMc	6 (3)	1 (1)
African 5 LF	3	MC	3 (2)	8 (2)	1 (1)	4 (1)
African 5 LF	3	Ses	8 (2)	3 (2)			pair
African 5 LF	3	MCP	0
African 5 LF	3	PP	4 (2)	8 (2)	3 (1)
African 5 LF	3	PIP	0
African 5 LF	3	MP	4 (1)	8 (1)
African 5 LF	3	DIP	0
African 5 LF	3	DP	0
African 5 LF	3	Sole	0
African 5 LF	3	Interdigital	0
African 5 LF	4	CMc	4 (1)	6 (1)
African 5 LF	4	MC	1 (2)	3 (2)	8 (2)	4 (2)
African 5 LF	4	Ses	3 (1)	8 (1)			pair
African 5 LF	4	MCP	6 (1)
African 5 LF	4	PP	8 (2)	3 (2)	1 (2)	4 (1)
African 5 LF	4	PIP	0
African 5 LF	4	MP	8 (1)
African 5 LF	4	DIP	0
African 5 LF	4	DP	0
African 5 LF	4	Sole	0
African 5 LF	4	Interdigital	1 (2)				Between d4 and d5
African 5 LF	5	CMc	4 (1)	8 (1)	6 (1)
African 5 LF	5	MC	3 (1)	8 (1)	4 (1)
African 5 LF	5	Ses	3 (1)				pair
African 5 LF	5	MCP	0
African 5 LF	5	PP	8 (1)	4 (1)
African 5 LF	5	PIP	0				Offset
African 5 LF	5	MP	8 (1)
African 5 LF	5	DIP	x
African 5 LF	5	DP	x
African 5 LF	5	Sole	10
African 5 LF	5	Interdigital	0
Asian 13 RF	1	CMc	6 (1)				predigit
Asian 13 RF	1	MC	8 (1)	3 (1)
Asian 13 RF	1	Ses	0				single sesamoid unfused
Asian 13 RF	1	MCP	0
Asian 13 RF	1	PP	0
Asian 13 RF	1	PIP	x
Asian 13 RF	1	MP	x
Asian 13 RF	1	DIP	x
Asian 13 RF	1	DP	x
Asian 13 RF	1	Sole	0
Asian 13 RF	1	Interdigital	0
Asian 13 RF	2	CMc	6 (2)	4 (2)	8 (1)
Asian 13 RF	2	MC	8 (1)	3 (1)
Asian 13 RF	2	Ses	0				fused
Asian 13 RF	2	MCP	6 (1)
Asian 13 RF	2	PP	1 (3)				bone island
Asian 13 RF	2	PIP	6 (1)
Asian 13 RF	2	MP	4 (1)
Asian 13 RF	2	DIP	0
Asian 13 RF	2	DP	0
Asian 13 RF	2	Sole	0
Asian 13 RF	2	Interdigital	1 (1)
Asian 13 RF	3	CMc	4 (1)	6 (1)	3 (2)
Asian 13 RF	3	MC	8 (1)	3 (2)	1 (2)		bone island
Asian 13 RF	3	Ses	8 (2)	4 (1)	3 (1)		fused
Asian 13 RF	3	MCP	6 (2)	1 (1)			supracondylar lysis?
Asian 13 RF	3	PP	8 (2)	3 (2)	4 (1)
Asian 13 RF	3	PIP	4 (1)	6 (1)
Asian 13 RF	3	MP	8 (2)	4 (1)
Asian 13 RF	3	DIP	0
Asian 13 RF	3	DP	8 (1)
Asian 13 RF	3	Sole	0
Asian 13 RF	3	Interdigital	0
Asian 13 RF	4	CMc	6 (3)
Asian 13 RF	4	MC	8 (2)	3 (2)	4 (2)
Asian 13 RF	4	Ses	8 (3)	3 (2)	6 (3)		fused
Asian 13 RF	4	MCP	6 (3)	4 (2)	8 (2)	7 (2)
Asian 13 RF	4	PP	4 (2)	8 (2)	1 (2)	3 (2)	several calcifications
Asian 13 RF	4	PIP	9	6 (1)			deformed bone
Asian 13 RF	4	MP	8 (1)
Asian 13 RF	4	DIP	0
Asian 13 RF	4	DP	0
Asian 13 RF	4	Sole	0
Asian 13 RF	4	Interdigital	0
Asian 13 RF	5	CMc	6 (2)	4 (2)	3 (1)
Asian 13 RF	5	MC	8 (2)	3 (2)	4 (2)
Asian 13 RF	5	Ses	4 (1)	3 (1)			fused
Asian 13 RF	5	MCP	6 (1)
Asian 13 RF	5	PP	8 (1)
Asian 13 RF	5	PIP	x
Asian 13 RF	5	MP	x				apparently missing MP, deformed-looking DP in wrong place
Asian 13 RF	5	DIP	x
Asian 13 RF	5	DP	0
Asian 13 RF	5	Sole	0
Asian 13 RF	5	Interdigital	0
Asian 13 LH	1	TMT	6 (1)				predigit articulates with digit 1 rodlike bone, middle soft tissue area and distal mineralisation (2 parts)
Asian 13 LH	1	MT	8 (2)	3 (2)	1 (1)	4 (2)
Asian 13 LH	1	Ses	x
Asian 13 LH	1	MTP	x
Asian 13 LH	1	PP	x
Asian 13 LH	1	PIP	x
Asian 13 LH	1	MP	x
Asian 13 LH	1	DIP	x
Asian 13 LH	1	DP	x
Asian 13 LH	1	Sole	0
Asian 13 LH	1	Interdigital	0
Asian 13 LH	2	TMT	6 (1)	1 (1)
Asian 13 LH	2	MT	8 (2)	1 (2)	4 (2)	3 (1)	palmar and dorsal calcification
Asian 13 LH	2	Ses	1 (1)	3 (1)			pair
Asian 13 LH	2	MTP	6 (2)	1 (3)
Asian 13 LH	2	PP	8 (2)	4 (2)
Asian 13 LH	2	PIP	0
Asian 13 LH	2	MP	8 (2)				absent or very rudimentary
Asian 13 LH	2	DIP	0
Asian 13 LH	2	DP	0
Asian 13 LH	2	Sole	10 (1)
Asian 13 LH	2	Interdigital	0
Asian 13 LH	3	TMT	6 (1)	1 (2)
Asian 13 LH	3	MT	8 (1)	3 (2)
Asian 13 LH	3	Ses	3 (1)				fused
Asian 13 LH	3	MTP	6 (1)
Asian 13 LH	3	PP	8 (1)
Asian 13 LH	3	PIP	0
Asian 13 LH	3	MP	8 (1)
Asian 13 LH	3	DIP	6 (1)
Asian 13 LH	3	DP	5	8 (2)			remodelled around fx area
Asian 13 LH	3	Sole	0
Asian 13 LH	3	Interdigital	1 (1)				between 3 and 4 MT's
Asian 13 LH	4	TMT	6 (1)	3 (1)
Asian 13 LH	4	MT	8 (1)	3 (2)
Asian 13 LH	4	Ses	3 (1)				fused
Asian 13 LH	4	MTP	6 (1)
Asian 13 LH	4	PP	8 (2)	3 (2)			misshapen good e,g
Asian 13 LH	4	PIP	0
Asian 13 LH	4	MP	8 (2)				deformed shape
Asian 13 LH	4	DIP	0
Asian 13 LH	4	DP	8 (1)
Asian 13 LH	4	Sole	0
Asian 13 LH	4	Interdigital	0
Asian 13 LH	5	TMT	4 (1)
Asian 13 LH	5	MT	8 (1)	3 (2)
Asian 13 LH	5	Ses	4 (1)	3 (1)			pair
Asian 13 LH	5	MTP	6 (1)
Asian 13 LH	5	PP	8 (1)
Asian 13 LH	5	PIP	x
Asian 13 LH	5	MP	x				absent or unossified
Asian 13 LH	5	DIP	x
Asian 13 LH	5	DP	0
Asian 13 LH	5	Sole	0
Asian 13 LH	5	Interdigital	0
African 7 RF	1	CMc	0
African 7 RF	1	MC	8 (1)				no predigit
African 7 RF	1	Ses	0				single
African 7 RF	1	MCP	0
African 7 RF	1	PP	0				abnormal shape
African 7 RF	1	PIP	x
African 7 RF	1	MP	x
African 7 RF	1	DIP	x
African 7 RF	1	DP	x
African 7 RF	1	Sole	0
African 7 RF	1	Interdigital	0
African 7 RF	2	CMc	0
African 7 RF	2	MC	3 (1)	8 (1)
African 7 RF	2	Ses	0				pair
African 7 RF	2	MCP	0
African 7 RF	2	PP	8 (1)
African 7 RF	2	PIP	0
African 7 RF	2	MP	8 (1)
African 7 RF	2	DIP	0
African 7 RF	2	DP	0
African 7 RF	2	Sole	0
African 7 RF	2	Interdigital	0
African 7 RF	3	CMc	3 (1)
African 7 RF	3	MC	8 (1)	3 (1)
African 7 RF	3	Ses	0				pair
African 7 RF	3	MCP	0
African 7 RF	3	PP	0
African 7 RF	3	PIP	6 (1)
African 7 RF	3	MP	0
African 7 RF	3	DIP	0
African 7 RF	3	DP	0
African 7 RF	3	Sole	0
African 7 RF	3	Interdigital	0
African 7 RF	4	CMc	0
African 7 RF	4	MC	8 (1)	3 (1)
African 7 RF	4	Ses	0				pair
African 7 RF	4	MCP	0
African 7 RF	4	PP	0
African 7 RF	4	PIP	0
African 7 RF	4	MP	0
African 7 RF	4	DIP	0
African 7 RF	4	DP	0
African 7 RF	4	Sole	0
African 7 RF	4	Interdigital	0
African 7 RF	5	CMc	0
African 7 RF	5	MC	8 (1)
African 7 RF	5	Ses	0				lateral bigger	pair
African 7 RF	5	MCP	0
African 7 RF	5	PP	0
African 7 RF	5	PIP	0
African 7 RF	5	MP	0
African 7 RF	5	DIP	x
African 7 RF	5	DP	x
African 7 RF	5	Sole	0
African 7 RF	5	Interdigital	0
Asian 4 RH	1	TMT	6 (1)				predigit
Asian 4 RH	1	MT	8 (1)	1 (1)	3 (1)		palmar to all MTs
Asian 4 RH	1	Ses	x
Asian 4 RH	1	MTP	x
Asian 4 RH	1	PP	x
Asian 4 RH	1	PIP	x
Asian 4 RH	1	MP	x
Asian 4 RH	1	DIP	x
Asian 4 RH	1	DP	x
Asian 4 RH	1	Sole	0
Asian 4 RH	1	Interdigital	0
Asian 4 RH	2	TMT	6 (3)	4 (2)	3 (2)	8 (2)
Asian 4 RH	2	MT	8 (2)	4 (2)	1 (2)		palmar to all MTs
Asian 4 RH	2	Ses	3 (2)	6 (1)			fused
Asian 4 RH	2	MTP	6 (1)
Asian 4 RH	2	PP	8 (2)	3 (2)
Asian 4 RH	2	PIP	0
Asian 4 RH	2	MP	8 (1)				deformed shape
Asian 4 RH	2	DIP	0
Asian 4 RH	2	DP	0				small
Asian 4 RH	2	Sole	0
Asian 4 RH	2	Interdigital	0
Asian 4 RH	3	TMT	6 (3)	4 (3)	3 (3)
Asian 4 RH	3	MT	8 (3)	4 (3)	3 (3)	1 (2)	2 (2)
Asian 4 RH	3	Ses	8 (3)	6 (2)	2 (2)	1 (2)	fused
Asian 4 RH	3	MTP	9	7 (2)	6 (2)		Extreme subluxation
Asian 4 RH	3	PP	8 (3)	3 (2)	4 (2)
Asian 4 RH	3	PIP	6 (1)
Asian 4 RH	3	MP	8 (1)
Asian 4 RH	3	DIP	0
Asian 4 RH	3	DP	0
Asian 4 RH	3	Sole	10				swelling
Asian 4 RH	3	Interdigital	0
Asian 4 RH	4	TMT	6 (3)	4 (2)	3 (2)	8 (2)
Asian 4 RH	4	MT	8 (3)	1 (2)	4 (3)	2 (3)
Asian 4 RH	4	Ses	8 (2)	6 (2)	2 (2)	3 (2)	fused
Asian 4 RH	4	MTP	6 (3)	7 (3)
Asian 4 RH	4	PP	5	8 (3)	3 (2)	4 (2)	misshapen	2 (2)
Asian 4 RH	4	PIP	6 (1)
Asian 4 RH	4	MP	8 (2)	4 (2)			misshapen
Asian 4 RH	4	DIP	6 (2)
Asian 4 RH	4	DP	0
Asian 4 RH	4	Sole	10 (2)
Asian 4 RH	4	Interdigital	0
Asian 4 RH	5	TMT	4 (3)	6 (2)	3 (1)	8 (1)
Asian 4 RH	5	MT	8 (2)	4 (2)	1 (2)	3 (2)	palmar to all MTs
Asian 4 RH	5	Ses	4 (1)	3 (1)	1 (2)		pair
Asian 4 RH	5	MTP	6 (1)	3 (1)
Asian 4 RH	5	PP	8 (1)
Asian 4 RH	5	PIP	x
Asian 4 RH	5	MP	x
Asian 4 RH	5	DIP	x
Asian 4 RH	5	DP	x
Asian 4 RH	5	Sole	0
Asian 4 RH	5	Interdigital	0
Asian 4 LF	1	CMc	0
Asian 4 LF	1	MC	8 (1)	4 (1)	3 (1)
Asian 4 LF	1	Ses	0				single
Asian 4 LF	1	MCP	0
Asian 4 LF	1	PP	8 (1)
Asian 4 LF	1	PIP	x
Asian 4 LF	1	MP	x
Asian 4 LF	1	DIP	x
Asian 4 LF	1	DP	x
Asian 4 LF	1	Sole	0
Asian 4 LF	1	Interdigital	0
Asian 4 LF	2	CMc	6 (2)	4 (2)	3 (2)	8 (1)
Asian 4 LF	2	MC	8 (1)	3 (1)
Asian 4 LF	2	Ses	8 (1)	3 (1)			fused
Asian 4 LF	2	MCP	0
Asian 4 LF	2	PP	8 (2)	4 (1)
Asian 4 LF	2	PIP	0
Asian 4 LF	2	MP	0
Asian 4 LF	2	DIP	0
Asian 4 LF	2	DP	0
Asian 4 LF	2	Sole	0
Asian 4 LF	2	Interdigital	0
Asian 4 LF	3	CMc	6 (1)	3 (1)	4 (1)
Asian 4 LF	3	MC	8 (1)	3 (1)
Asian 4 LF	3	Ses	3 (1)				pair
Asian 4 LF	3	MCP	6 (1)
Asian 4 LF	3	PP	8 (1)
Asian 4 LF	3	PIP	0
Asian 4 LF	3	MP	0
Asian 4 LF	3	DIP	0
Asian 4 LF	3	DP	0
Asian 4 LF	3	Sole	0
Asian 4 LF	3	Interdigital	0
Asian 4 LF	4	CMc	6 (2)	3 (2)	4 (2)
Asian 4 LF	4	MC	2 (3)	8 (3)			intervention -curetted away/removed/packed??
Asian 4 LF	4	Ses	x
Asian 4 LF	4	MCP	x
Asian 4 LF	4	PP	x
Asian 4 LF	4	PIP	x
Asian 4 LF	4	MP	x
Asian 4 LF	4	DIP	x
Asian 4 LF	4	DP	x
Asian 4 LF	4	Sole	10 (3)
Asian 4 LF	4	Interdigital	10 (3)
Asian 4 LF	5	CMc	6 (2)	4 (2)	3 (2)
Asian 4 LF	5	MC	8 (2)	3 (2)
Asian 4 LF	5	Ses	0				single
Asian 4 LF	5	MCP	0
Asian 4 LF	5	PP	8 (2)	3 (1)
Asian 4 LF	5	PIP	6 (1)
Asian 4 LF	5	MP	8 (1)
Asian 4 LF	5	DIP	0
Asian 4 LF	5	DP	0
Asian 4 LF	5	Sole	0
Asian 4 LF	5	Interdigital	0
Asian 4 RF	1	CMc	0				no predigit
Asian 4 RF	1	MC	8 (1)
Asian 4 RF	1	Ses	3 (1)	8 (1)			single
Asian 4 RF	1	MCP	0
Asian 4 RF	1	PP	1 (2)				palmar	looks like mineralised tendon
Asian 4 RF	1	PIP	x
Asian 4 RF	1	MP	x
Asian 4 RF	1	DIP	x
Asian 4 RF	1	DP	x
Asian 4 RF	1	Sole	0
Asian 4 RF	1	Interdigital	0
Asian 4 RF	2	CMc	1 (1)	6 (2)	3 (1)	4 (1)
Asian 4 RF	2	MC	8 (1)	3 (1)
Asian 4 RF	2	Ses	3 (2)	8 (1)			pair
Asian 4 RF	2	MCP	6 (1)
Asian 4 RF	2	PP	8 (1)	1 (2)	3 (1)
Asian 4 RF	2	PIP	0
Asian 4 RF	2	MP	8 (1)
Asian 4 RF	2	DIP	0
Asian 4 RF	2	DP	0
Asian 4 RF	2	Sole	0
Asian 4 RF	2	Interdigital	1 (2)
Asian 4 RF	3	CMc	1 (1)	6 (2)	3 (2)	4 (1)
Asian 4 RF	3	MC	8 (1)	3 (2)	1 (1)
Asian 4 RF	3	Ses	3 (1)				pair
Asian 4 RF	3	MCP	0
Asian 4 RF	3	PP	8 (2)	3 (2)	1 (2)
Asian 4 RF	3	PIP	0
Asian 4 RF	3	MP	4 (2)	8 (1)
Asian 4 RF	3	DIP	0
Asian 4 RF	3	DP	8 (1)	1 (1)
Asian 4 RF	3	Sole	0
Asian 4 RF	3	Interdigital	1 (2)
Asian 4 RF	4	CMc	6 (2)	3 (1)	8 (1)
Asian 4 RF	4	MC	4 (3)	8 (1)	3 (1)
Asian 4 RF	4	Ses	8 (1)	3 (1)	4 (1)		pair
Asian 4 RF	4	MCP	6 (1)
Asian 4 RF	4	PP	8 (2)	3 (2)	1 (2)
Asian 4 RF	4	PIP	0
Asian 4 RF	4	MP	0
Asian 4 RF	4	DIP	0
Asian 4 RF	4	DP	5				tripartite
Asian 4 RF	4	Sole	0
Asian 4 RF	4	Interdigital	1 (2)
Asian 4 RF	5	CMc	6 (2)	4 (2)	3 (1)
Asian 4 RF	5	MC	8 (2)	3 (2)
Asian 4 RF	5	Ses	8 (1)	3 (2)	4 (1)	1 (1)	fused
Asian 4 RF	5	MCP	0
Asian 4 RF	5	PP	8 (1)	1 (2)	4 (1)	3 (1)
Asian 4 RF	5	PIP	6 (1)
Asian 4 RF	5	MP	8 (2)	1 (2)	4 (1)
Asian 4 RF	5	DIP	0
Asian 4 RF	5	DP	5
Asian 4 RF	5	Sole	0
Asian 4 RF	5	Interdigital	1 (2)
African 7 LF	1	CMc	0				no predigit
African 7 LF	1	MC	8 (1)	4 (1)
African 7 LF	1	Ses	0				single
African 7 LF	1	MCP	0
African 7 LF	1	PP	0
African 7 LF	1	PIP	x
African 7 LF	1	MP	x
African 7 LF	1	DIP	x
African 7 LF	1	DP	x
African 7 LF	1	Sole	0
African 7 LF	1	Interdigital	0
African 7 LF	2	CMc	0	3 (1)
African 7 LF	2	MC	8 (1)	3 (1)	4 (2)
African 7 LF	2	Ses	0				pair
African 7 LF	2	MCP	0
African 7 LF	2	PP	8 (1)	3 (1)
African 7 LF	2	PIP	0
African 7 LF	2	MP	0
African 7 LF	2	DIP	x
African 7 LF	2	DP	x
African 7 LF	2	Sole	0
African 7 LF	2	Interdigital	0
African 7 LF	3	CMc	6 (1)	3 (1)	8 (1)
African 7 LF	3	MC	8 (2)	3 (1)
African 7 LF	3	Ses	0				pair
African 7 LF	3	MCP	6 (1)
African 7 LF	3	PP	8 (2)	4 (2)	3 (2)
African 7 LF	3	PIP	0
African 7 LF	3	MP	4 (1)
African 7 LF	3	DIP	0
African 7 LF	3	DP	1 (1)
African 7 LF	3	Sole	0
African 7 LF	3	Interdigital	0
African 7 LF	4	CMc	0
African 7 LF	4	MC	8 (2)	3 (2)	4 (2)
African 7 LF	4	Ses	4 (1)	6 (1)			pair
African 7 LF	4	MCP	6 (1)
African 7 LF	4	PP	8 (1)	3 (1)
African 7 LF	4	PIP	0
African 7 LF	4	MP	0
African 7 LF	4	DIP	0
African 7 LF	4	DP	0
African 7 LF	4	Sole	0
African 7 LF	4	Interdigital	0
African 7 LF	5	CMc	0
African 7 LF	5	MC	8 (1)	3 (1)
African 7 LF	5	Ses	0				unfused, asym	lat bigger
African 7 LF	5	MCP	0
African 7 LF	5	PP	8 (1)	3 (1)
African 7 LF	5	PIP	0
African 7 LF	5	MP	0
African 7 LF	5	DIP	x
African 7 LF	5	DP	x
African 7 LF	5	Sole	0
African 7 LF	5	Interdigital	0
African 4 RF	1	CMc	0				no predigit
African 4 RF	1	MC	0
African 4 RF	1	Ses	0				single
African 4 RF	1	MCP	0
African 4 RF	1	PP	0
African 4 RF	1	PIP	x
African 4 RF	1	MP	x
African 4 RF	1	DIP	x
African 4 RF	1	DP	x
African 4 RF	1	Sole	0
African 4 RF	1	Interdigital	0
African 4 RF	2	CMc	0
African 4 RF	2	MC	8 (1)	3 (1)
African 4 RF	2	Ses	0				pair
African 4 RF	2	MCP	0
African 4 RF	2	PP	0
African 4 RF	2	PIP	0
African 4 RF	2	MP	0
African 4 RF	2	DIP	0
African 4 RF	2	DP	0
African 4 RF	2	Sole	0
African 4 RF	2	Interdigital	0
African 4 RF	3	CMc	0
African 4 RF	3	MC	8 (1)	3 (1)	1 (1)		bone island
African 4 RF	3	Ses	0				pair
African 4 RF	3	MCP	0
African 4 RF	3	PP	8 (1)	4 (1)
African 4 RF	3	PIP	0
African 4 RF	3	MP	8 (1)
African 4 RF	3	DIP	0
African 4 RF	3	DP	0
African 4 RF	3	Sole	0
African 4 RF	3	Interdigital	0
African 4 RF	4	CMc	0
African 4 RF	4	MC	8 (1)	3 (1)	4 (1)
African 4 RF	4	Ses	3 (1)				pair
African 4 RF	4	MCP	0
African 4 RF	4	PP	8 (1)	3 (1)
African 4 RF	4	PIP	0
African 4 RF	4	MP	0
African 4 RF	4	DIP	0
African 4 RF	4	DP	0
African 4 RF	4	Sole	0
African 4 RF	4	Interdigital	0
African 4 RF	5	CMc	0
African 4 RF	5	MC	8 (1)	3 (1)
African 4 RF	5	Ses	3 (1)	4 (1)	8 (1)		fused
African 4 RF	5	MCP	0
African 4 RF	5	PP	8 (1)
African 4 RF	5	PIP	0
African 4 RF	5	MP	0
African 4 RF	5	DIP	x
African 4 RF	5	DP	x
African 4 RF	5	Sole	0
African 4 RF	5	Interdigital	0
Asian 12 RF	1	CMc	6 (1)				has PD, 2 parts
Asian 12 RF	1	MC	8 (2)	3 (2)
Asian 12 RF	1	Ses	8 (1)	3 (2)			single
Asian 12 RF	1	MCP	6 (1)
Asian 12 RF	1	PP	8 (1)
Asian 12 RF	1	PIP	x
Asian 12 RF	1	MP	x
Asian 12 RF	1	DIP	x
Asian 12 RF	1	DP	0
Asian 12 RF	1	Sole	0
Asian 12 RF	1	Interdigital	0
Asian 12 RF	2	CMc	6 (2)	3 (2)	4 (2)	8 (2)
Asian 12 RF	2	MC	8 (2)	3 (2)	4 (1)
Asian 12 RF	2	Ses	8 (2)	3 (2)	6 (2)		fused
Asian 12 RF	2	MCP	6 (2)	1 (2)
Asian 12 RF	2	PP	8 (2)	3 (2)	1 (1)		dorsal
Asian 12 RF	2	PIP	0
Asian 12 RF	2	MP	8 (1)
Asian 12 RF	2	DIP	0
Asian 12 RF	2	DP	8 (2)	1 (1)	5
Asian 12 RF	2	Sole	0
Asian 12 RF	2	Interdigital	0
Asian 12 RF	3	CMc	6 (1)	4 (1)
Asian 12 RF	3	MC	8 (2)	3 (2)
Asian 12 RF	3	Ses	8 (2)	3 (2)	1 (3)	6 (1)	fused
Asian 12 RF	3	MCP	6 (1)
Asian 12 RF	3	PP	8 (2)	3 (2)
Asian 12 RF	3	PIP	0
Asian 12 RF	3	MP	8 (1)	3 (1)
Asian 12 RF	3	DIP	3 (2)	6 (1)
Asian 12 RF	3	DP	1 (1)	8 (2)
Asian 12 RF	3	Sole	0
Asian 12 RF	3	Interdigital	1 (1)
Asian 12 RF	4	CMc	6 (1)	4 (1)
Asian 12 RF	4	MC	8 (2)	3 (2)
Asian 12 RF	4	Ses	8 (2)	4 (2)	3 (2)	1 (1)	fused
Asian 12 RF	4	MCP	6 (1)
Asian 12 RF	4	PP	8 (1)	3 (1)
Asian 12 RF	4	PIP	0
Asian 12 RF	4	MP	8 (1)	3 (1)
Asian 12 RF	4	DIP	0
Asian 12 RF	4	DP	8 (1)
Asian 12 RF	4	Sole	0
Asian 12 RF	4	Interdigital	1 (1)
Asian 12 RF	5	CMc	6 (1)	3 (1)
Asian 12 RF	5	MC	8 (1)	3 (1)	1 (1)
Asian 12 RF	5	Ses	8 (2)	3 (2)	4 (1)	1 (1)	pair
Asian 12 RF	5	MCP	6 (1)
Asian 12 RF	5	PP	8 (1)	3 (1)	1 (1)
Asian 12 RF	5	PIP	0
Asian 12 RF	5	MP	8 (1)
Asian 12 RF	5	DIP	0
Asian 12 RF	5	DP	8 (1)	5
Asian 12 RF	5	Sole	0
Asian 12 RF	5	Interdigital	0
Asian 12 RH	1	CMc	0				Predigit
Asian 12 RH	1	MC	8 (1)	3 (1)
Asian 12 RH	1	Ses	8 (1)	6 (1)			single
Asian 12 RH	1	MCP	x
Asian 12 RH	1	PP	x
Asian 12 RH	1	PIP	x
Asian 12 RH	1	MP	x
Asian 12 RH	1	DIP	x
Asian 12 RH	1	DP	x
Asian 12 RH	1	Sole	0
Asian 12 RH	1	Interdigital	0
Asian 12 RH	2	CMc	6 (1)	4 (1)	3 (1)
Asian 12 RH	2	MC	8 (1)
Asian 12 RH	2	Ses	8 (1)	1 (1)			single	palmar
Asian 12 RH	2	MCP	6 (1)
Asian 12 RH	2	PP	3 (1)
Asian 12 RH	2	PIP	0
Asian 12 RH	2	MP	0
Asian 12 RH	2	DIP	0
Asian 12 RH	2	DP	0
Asian 12 RH	2	Sole	0
Asian 12 RH	2	Interdigital	0
Asian 12 RH	3	CMc	1 (1)	6 (1)	3 (1)
Asian 12 RH	3	MC	8 (1)
Asian 12 RH	3	Ses	8 (1)	6 (1)	3 (1)		fused
Asian 12 RH	3	MCP	6 (1)
Asian 12 RH	3	PP	0
Asian 12 RH	3	PIP	0
Asian 12 RH	3	MP	0
Asian 12 RH	3	DIP	0
Asian 12 RH	3	DP	8 (1)
Asian 12 RH	3	Sole	0
Asian 12 RH	3	Interdigital	1 (2)
Asian 12 RH	4	CMc	1 (1)	4 (2)	6 (1)	3 (1)
Asian 12 RH	4	MC	8 (1)	3 (2)
Asian 12 RH	4	Ses	6 (1)	4 (1)	3 (1)		fused
Asian 12 RH	4	MCP	6 (1)
Asian 12 RH	4	PP	3 (1)	8 (1)
Asian 12 RH	4	PIP	0
Asian 12 RH	4	MP	0
Asian 12 RH	4	DIP	0
Asian 12 RH	4	DP	8 (1)
Asian 12 RH	4	Sole	0
Asian 12 RH	4	Interdigital	0
Asian 12 RH	5	CMc	1 (2)	8 (2)
Asian 12 RH	5	MC	3 (2)	8 (2)
Asian 12 RH	5	Ses	4 (1)	8 (1)	6 (1)	3 (1)	paired
Asian 12 RH	5	MCP	6 (1)
Asian 12 RH	5	PP	8 (2)				misshapen
Asian 12 RH	5	PIP	9				very subluxated
Asian 12 RH	5	MP	8 (2)
Asian 12 RH	5	DIP	0
Asian 12 RH	5	DP	8 (2)
Asian 12 RH	5	Sole	0
Asian 12 RH	5	Interdigital	0
Asian 12 LH	1	CMc	6 (1)				Predigit
Asian 12 LH	1	MC	8 (2)	3 (1)
Asian 12 LH	1	Ses	8 (2)	6 (1)			single
Asian 12 LH	1	MCP	x
Asian 12 LH	1	PP	x
Asian 12 LH	1	PIP	x
Asian 12 LH	1	MP	x
Asian 12 LH	1	DIP	x
Asian 12 LH	1	DP	x
Asian 12 LH	1	Sole	0
Asian 12 LH	1	Interdigital	0
Asian 12 LH	2	CMc	1 (2)	4 (1)	3 (2)	8 (2)
Asian 12 LH	2	MC	8 (2)	3 (1)	1 (1)
Asian 12 LH	2	Ses	4 (1)	8 (1)			fused
Asian 12 LH	2	MCP	6 (1)
Asian 12 LH	2	PP	8 (1)
Asian 12 LH	2	PIP	0
Asian 12 LH	2	MP	0
Asian 12 LH	2	DIP	0
Asian 12 LH	2	DP	0
Asian 12 LH	2	Sole	0
Asian 12 LH	2	Interdigital	0
Asian 12 LH	3	CMc	1 (2)	6 (2)	3 (2)	8 (1)
Asian 12 LH	3	MC	8 (1)	4 (1)
Asian 12 LH	3	Ses	3 (1)				fused
Asian 12 LH	3	MCP	6 (1)
Asian 12 LH	3	PP	8 (1)
Asian 12 LH	3	PIP	0
Asian 12 LH	3	MP	0
Asian 12 LH	3	DIP	0
Asian 12 LH	3	DP	0
Asian 12 LH	3	Sole	0
Asian 12 LH	3	Interdigital	0
Asian 12 LH	4	CMc	1 (2)	3 (1)	8 (1)
Asian 12 LH	4	MC	8 (2)	1 (1)
Asian 12 LH	4	Ses	8 (1)	6 (1)			fused
Asian 12 LH	4	MCP	6 (1)
Asian 12 LH	4	PP	8 (1)	3 (1)
Asian 12 LH	4	PIP	0
Asian 12 LH	4	MP	0
Asian 12 LH	4	DIP	0
Asian 12 LH	4	DP	8 (1)
Asian 12 LH	4	Sole	0
Asian 12 LH	4	Interdigital	0
Asian 12 LH	5	CMc	1 (2)	3 (2)	8 (2)
Asian 12 LH	5	MC	3 (2)	8 (2)	1 (1)
Asian 12 LH	5	Ses	3 (2)	4 (1)	6 (1)		pair	lateral bigger
Asian 12 LH	5	MCP	6 (1)
Asian 12 LH	5	PP	8 (1)
Asian 12 LH	5	PIP	9				very subluxated
Asian 12 LH	5	MP	8 (2)	x			small and misshapen
Asian 12 LH	5	DIP	0
Asian 12 LH	5	DP	8 (2)
Asian 12 LH	5	Sole	0
Asian 12 LH	5	Interdigital	0
Asian 12 LF	1	CMc	6 (1)				predigit
Asian 12 LF	1	MC	8 (1)
Asian 12 LF	1	Ses	8 (1)	3 (1)			single
Asian 12 LF	1	MCP	6 (1)
Asian 12 LF	1	PP	8 (1)	3 (1)
Asian 12 LF	1	PIP	x
Asian 12 LF	1	MP	x
Asian 12 LF	1	DIP	x
Asian 12 LF	1	DP	0
Asian 12 LF	1	Sole	0
Asian 12 LF	1	Interdigital	0
Asian 12 LF	2	CMc	1 (1)	3 (1)	6 (1)
Asian 12 LF	2	MC	8 (2)	3 (2)	1 (1)
Asian 12 LF	2	Ses	1 (1)	8 (1)	3 (1)		fused
Asian 12 LF	2	MCP	6 (1)
Asian 12 LF	2	PP	1 (1)	8 (1)	3 (1)
Asian 12 LF	2	PIP	6 (1)
Asian 12 LF	2	MP	8 (1)	3 (1)
Asian 12 LF	2	DIP	0
Asian 12 LF	2	DP	5	8 (2)
Asian 12 LF	2	Sole	0
Asian 12 LF	2	Interdigital	1 (1)
Asian 12 LF	3	CMc	1 (1)	6 (1)
Asian 12 LF	3	MC	8 (2)	3 (1)	4 (1)
Asian 12 LF	3	Ses	6 (2)	8 (2)	3 (2)	1 (1)	fused
Asian 12 LF	3	MCP	6 (2)
Asian 12 LF	3	PP	8 (2)	3 (1)	1 (1)
Asian 12 LF	3	PIP	0
Asian 12 LF	3	MP	8 (1)
Asian 12 LF	3	DIP	9				widened space but good alignment
Asian 12 LF	3	DP	5	8 (2)
Asian 12 LF	3	Sole	0
Asian 12 LF	3	Interdigital	1 (1)
Asian 12 LF	4	CMc	1 (1)	3 (1)	6 (1)
Asian 12 LF	4	MC	8 (1)	3 (1)
Asian 12 LF	4	Ses	3 (2)	8 (1)	6 (1)	1 (1)	fused
Asian 12 LF	4	MCP	0
Asian 12 LF	4	PP	8 (1)	3 (2)
Asian 12 LF	4	PIP	6 (1)
Asian 12 LF	4	MP	8 (2)	3 (1)
Asian 12 LF	4	DIP	9				widened
Asian 12 LF	4	DP	0
Asian 12 LF	4	Sole	0
Asian 12 LF	4	Interdigital	1 (1)
Asian 12 LF	5	CMc	1 (1)	6 (2)	8 (2)	3 (2)
Asian 12 LF	5	MC	8 (2)	3 (2)	1 (1)
Asian 12 LF	5	Ses	1 (1)	3 (1)			pair
Asian 12 LF	5	MCP	6 (1)
Asian 12 LF	5	PP	1 (2)	8 (1)
Asian 12 LF	5	PIP	0
Asian 12 LF	5	MP	0
Asian 12 LF	5	DIP	0
Asian 12 LF	5	DP	0
Asian 12 LF	5	Sole	0
Asian 12 LF	5	Interdigital	1 (1)
Asian 9 RH	1	CMc	6 (2)	3 (1)			predigit
Asian 9 RH	1	MC	8 (2)	3 (1)
Asian 9 RH	1	Ses	0				single small
Asian 9 RH	1	MCP	4 (1)	6 (1)	9
Asian 9 RH	1	PP	8 (1)
Asian 9 RH	1	PIP	0
Asian 9 RH	1	MP	0				small
Asian 9 RH	1	DIP	x
Asian 9 RH	1	DP	x
Asian 9 RH	1	Sole	0
Asian 9 RH	1	Interdigital	0
Asian 9 RH	2	CMc	6 (1)	4 (1)
Asian 9 RH	2	MC	8 (1)
Asian 9 RH	2	Ses	3 (1)				pair
Asian 9 RH	2	MCP	0
Asian 9 RH	2	PP	8 (1)
Asian 9 RH	2	PIP	0
Asian 9 RH	2	MP	0
Asian 9 RH	2	DIP	0
Asian 9 RH	2	DP	5
Asian 9 RH	2	Sole	0
Asian 9 RH	2	Interdigital	0
Asian 9 RH	3	CMc	6 (2)	3 (1)
Asian 9 RH	3	MC	8 (2)	3 (1)
Asian 9 RH	3	Ses	6 (1)	8 (1)	3 (1)		fused
Asian 9 RH	3	MCP	6 (1)
Asian 9 RH	3	PP	8 (2)	3 (2)
Asian 9 RH	3	PIP	6 (2)
Asian 9 RH	3	MP	8 (1)
Asian 9 RH	3	DIP	6 (1)
Asian 9 RH	3	DP	5	8 (1)
Asian 9 RH	3	Sole	0
Asian 9 RH	3	Interdigital	0
Asian 9 RH	4	CMc	6 (1)	3 (1)	1 (1)
Asian 9 RH	4	MC	1 (1)	8 (2)	3 (1)
Asian 9 RH	4	Ses	3 (2)				fused
Asian 9 RH	4	MCP	6 (1)
Asian 9 RH	4	PP	8 (1)	3 (2)
Asian 9 RH	4	PIP	6 (1)
Asian 9 RH	4	MP	8 (1)	3 (1)
Asian 9 RH	4	DIP	0
Asian 9 RH	4	DP	0
Asian 9 RH	4	Sole	0
Asian 9 RH	4	Interdigital	0
Asian 9 RH	5	CMc	6 (1)	3 (1)
Asian 9 RH	5	MC	8 (1)	3 (1)
Asian 9 RH	5	Ses	4 (1)	3 (1)			pair
Asian 9 RH	5	MCP	6 (1)
Asian 9 RH	5	PP	8 (1)
Asian 9 RH	5	PIP	x
Asian 9 RH	5	MP	x
Asian 9 RH	5	DIP	x
Asian 9 RH	5	DP	5
Asian 9 RH	5	Sole	0
Asian 9 RH	5	Interdigital	0
Asian 1 RF	1	CMc	0
Asian 1 RF	1	MC	4 (1)
Asian 1 RF	1	Ses	0				single small
Asian 1 RF	1	MCP	0
Asian 1 RF	1	PP	0
Asian 1 RF	1	PIP	x
Asian 1 RF	1	MP	x
Asian 1 RF	1	DIP	x
Asian 1 RF	1	DP	x
Asian 1 RF	1	Sole	0
Asian 1 RF	1	Interdigital	0
Asian 1 RF	2	CMc	0
Asian 1 RF	2	MC	8 (1)
Asian 1 RF	2	Ses	0				pair
Asian 1 RF	2	MCP	0
Asian 1 RF	2	PP	8 (1)	3 (1)
Asian 1 RF	2	PIP	0
Asian 1 RF	2	MP	0
Asian 1 RF	2	DIP	0
Asian 1 RF	2	DP	0
Asian 1 RF	2	Sole	0
Asian 1 RF	2	Interdigital	0
Asian 1 RF	3	CMc	0
Asian 1 RF	3	MC	3 (1)
Asian 1 RF	3	Ses	0				pair
Asian 1 RF	3	MCP	0
Asian 1 RF	3	PP	8 (1)	3 (1)	4 (2)
Asian 1 RF	3	PIP	0
Asian 1 RF	3	MP	0
Asian 1 RF	3	DIP	0
Asian 1 RF	3	DP	8 (1)
Asian 1 RF	3	Sole	0
Asian 1 RF	3	Interdigital	0
Asian 1 RF	4	CMc	0
Asian 1 RF	4	MC	8 (1)
Asian 1 RF	4	Ses	0				pair
Asian 1 RF	4	MCP	0
Asian 1 RF	4	PP	8 (1)
Asian 1 RF	4	PIP	0
Asian 1 RF	4	MP	8 (2)				misshapen
Asian 1 RF	4	DIP	9
Asian 1 RF	4	DP	5				or non osseous union
Asian 1 RF	4	Sole	0
Asian 1 RF	4	Interdigital	0
Asian 1 RF	5	CMc	0
Asian 1 RF	5	MC	8 (1)	3 (1)
Asian 1 RF	5	Ses	3 (1)				fused
Asian 1 RF	5	MCP	0
Asian 1 RF	5	PP	8 (1)	3 (1)
Asian 1 RF	5	PIP	0
Asian 1 RF	5	MP	0
Asian 1 RF	5	DIP	0
Asian 1 RF	5	DP	0				small
Asian 1 RF	5	Sole	0
Asian 1 RF	5	Interdigital	0
Asian 9 LH	1	CMc	6 (1)	8 (1)	3 (1)		predigit
Asian 9 LH	1	MC	8 (2)	3 (1)
Asian 9 LH	1	Ses	8 (1)				single
Asian 9 LH	1	MCP	9	6 (1)
Asian 9 LH	1	PP	8 (1)
Asian 9 LH	1	PIP	x
Asian 9 LH	1	MP	x
Asian 9 LH	1	DIP	x
Asian 9 LH	1	DP	x
Asian 9 LH	1	Sole	0
Asian 9 LH	1	Interdigital	0
Asian 9 LH	2	CMc	6 (1)	3 (2)
Asian 9 LH	2	MC	1 (2)	4 (1)	8 (1)	3 (1)
Asian 9 LH	2	Ses	6 (1)	3 (1)	8 (1)		fused, just about
Asian 9 LH	2	MCP	6 (1)
Asian 9 LH	2	PP	8 (1)
Asian 9 LH	2	PIP	0
Asian 9 LH	2	MP	8 (1)
Asian 9 LH	2	DIP	0
Asian 9 LH	2	DP	5
Asian 9 LH	2	Sole	0
Asian 9 LH	2	Interdigital	1 (2)
Asian 9 LH	3	CMc	6 (2)	1 (2)	3 (2)
Asian 9 LH	3	MC	1 (1)	8 (1)	2 (1)
Asian 9 LH	3	Ses	2 (3)	8 (3)			unclear, lytic
Asian 9 LH	3	MCP	7 (2)
Asian 9 LH	3	PP	8 (2)	3 (2)	1 (2)
Asian 9 LH	3	PIP	1 (2)	6 (2)
Asian 9 LH	3	MP	8 (2)	3 (1)
Asian 9 LH	3	DIP	0
Asian 9 LH	3	DP	5				nice e.g. of no callus multipart
Asian 9 LH	3	Sole	0
Asian 9 LH	3	Interdigital	0
Asian 9 LH	4	CMc	4 (2)	6 (1)	3 (1)
Asian 9 LH	4	MC	8 (1)
Asian 9 LH	4	Ses	8 (2)	6 (1)			fused
Asian 9 LH	4	MCP	6 (1)	2 (1)
Asian 9 LH	4	PP	8 (1)	3 (1)
Asian 9 LH	4	PIP	6 (1)
Asian 9 LH	4	MP	8 (1)
Asian 9 LH	4	DIP	0
Asian 9 LH	4	DP	0
Asian 9 LH	4	Sole	0
Asian 9 LH	4	Interdigital	0
Asian 9 LH	5	CMc	4 (2)	6 (1)	1 (2)
Asian 9 LH	5	MC	8 (2)
Asian 9 LH	5	Ses	4 (1)	3 (1)			pair
Asian 9 LH	5	MCP	6 (1)
Asian 9 LH	5	PP	0
Asian 9 LH	5	PIP	x				extreme wide gap
Asian 9 LH	5	MP	x
Asian 9 LH	5	DIP	x
Asian 9 LH	5	DP	8 (2)	5?
Asian 9 LH	5	Sole	0
Asian 9 LH	5	Interdigital	0
Asian 1 LF	1	CMc	0
Asian 1 LF	1	MC	8 (1)
Asian 1 LF	1	Ses	0				single
Asian 1 LF	1	MCP	0
Asian 1 LF	1	PP	0
Asian 1 LF	1	PIP	x
Asian 1 LF	1	MP	x
Asian 1 LF	1	DIP	x
Asian 1 LF	1	DP	x
Asian 1 LF	1	Sole	0
Asian 1 LF	1	Interdigital	0
Asian 1 LF	2	CMc	6 (1)	3 (1)
Asian 1 LF	2	MC	8 (1)	3 (1)
Asian 1 LF	2	Ses	0				pair
Asian 1 LF	2	MCP	0
Asian 1 LF	2	PP	8 (1)
Asian 1 LF	2	PIP	0
Asian 1 LF	2	MP	0
Asian 1 LF	2	DIP	0
Asian 1 LF	2	DP	0
Asian 1 LF	2	Sole	0
Asian 1 LF	2	Interdigital	0
Asian 1 LF	3	CMc	6 (1)	3 (1)
Asian 1 LF	3	MC	8 (1)
Asian 1 LF	3	Ses	0				pair
Asian 1 LF	3	MCP	6 (1)
Asian 1 LF	3	PP	8 (1)
Asian 1 LF	3	PIP	0
Asian 1 LF	3	MP	0
Asian 1 LF	3	DIP	0
Asian 1 LF	3	DP	0
Asian 1 LF	3	Sole	0
Asian 1 LF	3	Interdigital	0
Asian 1 LF	4	CMc	0
Asian 1 LF	4	MC	8 (1)	3 (1)
Asian 1 LF	4	Ses	3 (1)				pair
Asian 1 LF	4	MCP	6 (1)
Asian 1 LF	4	PP	8 (1)	3 (1)
Asian 1 LF	4	PIP	0
Asian 1 LF	4	MP	0
Asian 1 LF	4	DIP	0
Asian 1 LF	4	DP	0
Asian 1 LF	4	Sole	0
Asian 1 LF	4	Interdigital	0
Asian 1 LF	5	CMc	6 (1)	3 (1)
Asian 1 LF	5	MC	3 (1)
Asian 1 LF	5	Ses	8 (1)				fused
Asian 1 LF	5	MCP	0
Asian 1 LF	5	PP	8 (1)
Asian 1 LF	5	PIP	0
Asian 1 LF	5	MP	0
Asian 1 LF	5	DIP	0
Asian 1 LF	5	DP	0
Asian 1 LF	5	Sole	0
Asian 1 LF	5	Interdigital	0
African 2 RH	1	CMc	0				tiny predig ossification
African 2 RH	1	MC	8 (1)	3 (1)
African 2 RH	1	Ses	0				single
African 2 RH	1	MCP	x
African 2 RH	1	PP	x
African 2 RH	1	PIP	x
African 2 RH	1	MP	x
African 2 RH	1	DIP	x
African 2 RH	1	DP	x
African 2 RH	1	Sole	0
African 2 RH	1	Interdigital	0
African 2 RH	2	CMc	6 (1)
African 2 RH	2	MC	8 (1)
African 2 RH	2	Ses	0				pair
African 2 RH	2	MCP	0
African 2 RH	2	PP	0
African 2 RH	2	PIP	0
African 2 RH	2	MP	0
African 2 RH	2	DIP	0
African 2 RH	2	DP	0
African 2 RH	2	Sole	10				looks artefactual
African 2 RH	2	Interdigital	0
African 2 RH	3	CMc	0
African 2 RH	3	MC	8 (1)
African 2 RH	3	Ses	0				pair
African 2 RH	3	MCP	0
African 2 RH	3	PP	4 (1)
African 2 RH	3	PIP	0
African 2 RH	3	MP	0
African 2 RH	3	DIP	0
African 2 RH	3	DP	0
African 2 RH	3	Sole	0
African 2 RH	3	Interdigital	0
African 2 RH	4	CMc	6 (1)
African 2 RH	4	MC	8 (1)	3 (1)
African 2 RH	4	Ses	3 (1)				pair
African 2 RH	4	MCP	6 (1)
African 2 RH	4	PP	8 (1)
African 2 RH	4	PIP	0
African 2 RH	4	MP	0
African 2 RH	4	DIP	0
African 2 RH	4	DP	0
African 2 RH	4	Sole	0
African 2 RH	4	Interdigital	0
African 2 RH	5	CMc	6 (1)	3 (1)
African 2 RH	5	MC	8 (1)	3 (1)	4 (2)
African 2 RH	5	Ses	4 (1)				pair
African 2 RH	5	MCP	6 (1)
African 2 RH	5	PP	8 (1)
African 2 RH	5	PIP	0
African 2 RH	5	MP	0
African 2 RH	5	DIP	x
African 2 RH	5	DP	x
African 2 RH	5	Sole	0
African 2 RH	5	Interdigital	0
African 2 RF	1	CMc	0				predigit
African 2 RF	1	MC	3 (2)
African 2 RF	1	Ses	0				single
African 2 RF	1	MCP	0
African 2 RF	1	PP	0
African 2 RF	1	PIP	x
African 2 RF	1	MP	x
African 2 RF	1	DIP	x
African 2 RF	1	DP	x
African 2 RF	1	Sole	0
African 2 RF	1	Interdigital	0
African 2 RF	2	CMc	6 (1)	3 (1)
African 2 RF	2	MC	0
African 2 RF	2	Ses	4 (1)				pair
African 2 RF	2	MCP	0
African 2 RF	2	PP	8 (1)
African 2 RF	2	PIP	0
African 2 RF	2	MP	0
African 2 RF	2	DIP	0
African 2 RF	2	DP	0
African 2 RF	2	Sole	0
African 2 RF	2	Interdigital	0
African 2 RF	3	CMc	3 (1)	6 (1)
African 2 RF	3	MC	3 (1)	4 (1)
African 2 RF	3	Ses	3 (1)				paired
African 2 RF	3	MCP	6 (1)
African 2 RF	3	PP	8 (1)	3 (1)
African 2 RF	3	PIP	0
African 2 RF	3	MP	4 (1)
African 2 RF	3	DIP	0
African 2 RF	3	DP	0
African 2 RF	3	Sole	0
African 2 RF	3	Interdigital	0
African 2 RF	4	CMc	3 (1)	6 (1)
African 2 RF	4	MC	3 (1)
African 2 RF	4	Ses	0				pair
African 2 RF	4	MCP	0
African 2 RF	4	PP	3 (1)	8 (1)
African 2 RF	4	PIP	0
African 2 RF	4	MP	0
African 2 RF	4	DIP	0
African 2 RF	4	DP	0
African 2 RF	4	Sole	0
African 2 RF	4	Interdigital	0
African 2 RF	5	CMc	3 (1)
African 2 RF	5	MC	3 (1)
African 2 RF	5	Ses	0				pair
African 2 RF	5	MCP	0
African 2 RF	5	PP	0
African 2 RF	5	PIP	0
African 2 RF	5	MP	0
African 2 RF	5	DIP	0
African 2 RF	5	DP	x
African 2 RF	5	Sole	0
African 2 RF	5	Interdigital	0
African 2 LF	1	CMc	4 (2)				predigit
African 2 LF	1	MC	3 (1)
African 2 LF	1	Ses	3 (1)				fused
African 2 LF	1	MCP	0
African 2 LF	1	PP	0
African 2 LF	1	PIP	x
African 2 LF	1	MP	x
African 2 LF	1	DIP	x
African 2 LF	1	DP	x
African 2 LF	1	Sole	0
African 2 LF	1	Interdigital	0
African 2 LF	2	CMc	3 (1)
African 2 LF	2	MC	3 (1)
African 2 LF	2	Ses	0				pair
African 2 LF	2	MCP	0
African 2 LF	2	PP	8 (1)
African 2 LF	2	PIP	0
African 2 LF	2	MP	0
African 2 LF	2	DIP	0
African 2 LF	2	DP	0
African 2 LF	2	Sole	0
African 2 LF	2	Interdigital	0
African 2 LF	3	CMc	8 (1)	3 (2)	6 (1)
African 2 LF	3	MC	8 (1)
African 2 LF	3	Ses	0				pair
African 2 LF	3	MCP	8 (1)	3 (1)
African 2 LF	3	PP	0
African 2 LF	3	PIP	0
African 2 LF	3	MP	0
African 2 LF	3	DIP	0
African 2 LF	3	DP	0
African 2 LF	3	Sole	0
African 2 LF	3	Interdigital	0
African 2 LF	4	CMc	0
African 2 LF	4	MC	3 (1)
African 2 LF	4	Ses	8 (1)				pair
African 2 LF	4	MCP	6 (1)
African 2 LF	4	PP	0
African 2 LF	4	PIP	0
African 2 LF	4	MP	0
African 2 LF	4	DIP	0
African 2 LF	4	DP	0
African 2 LF	4	Sole	0
African 2 LF	4	Interdigital	0
African 2 LF	5	CMc	0
African 2 LF	5	MC	8 (1)
African 2 LF	5	Ses	4 (1)				pair
African 2 LF	5	MCP	0
African 2 LF	5	PP	3 (1)
African 2 LF	5	PIP	0
African 2 LF	5	MP	0
African 2 LF	5	DIP	x
African 2 LF	5	DP	x
African 2 LF	5	Sole	0
African 2 LF	5	Interdigital	0
African 2 LH	1	CMc	0				small predigit
African 2 LH	1	MC	0
African 2 LH	1	Ses	0				single
African 2 LH	1	MCP	x
African 2 LH	1	PP	x
African 2 LH	1	PIP	x
African 2 LH	1	MP	x
African 2 LH	1	DIP	x
African 2 LH	1	DP	x
African 2 LH	1	Sole	0
African 2 LH	1	Interdigital	0
African 2 LH	2	CMc	3 (1)
African 2 LH	2	MC	8 (1)
African 2 LH	2	Ses	0				pair
African 2 LH	2	MCP	0
African 2 LH	2	PP	0
African 2 LH	2	PIP	0
African 2 LH	2	MP	0
African 2 LH	2	DIP	x
African 2 LH	2	DP	x
African 2 LH	2	Sole	0
African 2 LH	2	Interdigital	0
African 2 LH	3	CMc	6 (1)
African 2 LH	3	MC	3 (1)
African 2 LH	3	Ses	0				pair
African 2 LH	3	MCP	0
African 2 LH	3	PP	8 (1)
African 2 LH	3	PIP	0
African 2 LH	3	MP	0
African 2 LH	3	DIP	0
African 2 LH	3	DP	0
African 2 LH	3	Sole	0
African 2 LH	3	Interdigital	0
African 2 LH	4	CMc	0
African 2 LH	4	MC	3 (1)	8 (1)
African 2 LH	4	Ses	4 (1)				pair
African 2 LH	4	MCP	6 (1)
African 2 LH	4	PP	8 (1)
African 2 LH	4	PIP	0
African 2 LH	4	MP	0
African 2 LH	4	DIP	0
African 2 LH	4	DP	0
African 2 LH	4	Sole	0
African 2 LH	4	Interdigital	0
African 2 LH	5	CMc	0
African 2 LH	5	MC	3 (1)	8 (1)
African 2 LH	5	Ses	3 (1)				pair
African 2 LH	5	MCP	4 (1)	6 (1)
African 2 LH	5	PP	8 (1)
African 2 LH	5	PIP	0
African 2 LH	5	MP	0
African 2 LH	5	DIP	x
African 2 LH	5	DP	x
African 2 LH	5	Sole	0
African 2 LH	5	Interdigital	0
Asian 2 RH	1	CMc	0				predigit
Asian 2 RH	1	MC	8 (2)	3 (2)
Asian 2 RH	1	Ses	x
Asian 2 RH	1	MCP	x
Asian 2 RH	1	PP	x
Asian 2 RH	1	PIP	x
Asian 2 RH	1	MP	x
Asian 2 RH	1	DIP	x
Asian 2 RH	1	DP	x
Asian 2 RH	1	Sole	0
Asian 2 RH	1	Interdigital	0
Asian 2 RH	2	CMc	3 (2)
Asian 2 RH	2	MC	3 (2)	8 (2)
Asian 2 RH	2	Ses	4 (1)				pair
Asian 2 RH	2	MCP	6 (1)
Asian 2 RH	2	PP	8 (1)	3 (1)
Asian 2 RH	2	PIP	0
Asian 2 RH	2	MP	8 (1)
Asian 2 RH	2	DIP	0
Asian 2 RH	2	DP	0
Asian 2 RH	2	Sole	0
Asian 2 RH	2	Interdigital	0
Asian 2 RH	3	CMc	3 (1)
Asian 2 RH	3	MC	3 (2)	8 (1)
Asian 2 RH	3	Ses	3 (1)				fused
Asian 2 RH	3	MCP	0
Asian 2 RH	3	PP	8 (2)	3 (2)
Asian 2 RH	3	PIP	6 (2)	1 (2)
Asian 2 RH	3	MP	8 (2)
Asian 2 RH	3	DIP	6 (1)
Asian 2 RH	3	DP	5	1 (3)	8 (2)
Asian 2 RH	3	Sole	0
Asian 2 RH	3	Interdigital	0
Asian 2 RH	4	CMc	4 (2)	3 (1)
Asian 2 RH	4	MC	3 (1)	8 (1)
Asian 2 RH	4	Ses	3 (1)				fused
Asian 2 RH	4	MCP	6 (1)
Asian 2 RH	4	PP	3 (2)	8 (1)
Asian 2 RH	4	PIP	0
Asian 2 RH	4	MP	8 (1)
Asian 2 RH	4	DIP	0
Asian 2 RH	4	DP	8 (2)
Asian 2 RH	4	Sole	0
Asian 2 RH	4	Interdigital	0
Asian 2 RH	5	CMc	3 (1)	4 (1)
Asian 2 RH	5	MC	3 (2)	8 (2)
Asian 2 RH	5	Ses	4 (1)	3 (1)			pair
Asian 2 RH	5	MCP	6 (1)
Asian 2 RH	5	PP	3 (2)	8 (2)
Asian 2 RH	5	PIP	0
Asian 2 RH	5	MP	0				small
Asian 2 RH	5	DIP	0
Asian 2 RH	5	DP	8 (1)
Asian 2 RH	5	Sole	0
Asian 2 RH	5	Interdigital	0
African 6 RF	1	CMc	0				predigit small
African 6 RF	1	MC	8 (1)	4 (2)
African 6 RF	1	Ses	4 (2)				single
African 6 RF	1	MCP	0
African 6 RF	1	PP	0
African 6 RF	1	PIP	x
African 6 RF	1	MP	x
African 6 RF	1	DIP	x
African 6 RF	1	DP	x
African 6 RF	1	Sole	0
African 6 RF	1	Interdigital	0
African 6 RF	2	CMc	4 (1)	6 (1)
African 6 RF	2	MC	3 (2)	8 (1)
African 6 RF	2	Ses	0				pair
African 6 RF	2	MCP	0
African 6 RF	2	PP	4 (2)	8 (1)
African 6 RF	2	PIP	0
African 6 RF	2	MP	0
African 6 RF	2	DIP	0
African 6 RF	2	DP	0
African 6 RF	2	Sole	0
African 6 RF	2	Interdigital	0
African 6 RF	3	CMc	3 (1)	8 (1)
African 6 RF	3	MC	3 (1)	4 (1)
African 6 RF	3	Ses	8 (1)	3 (1)	1 (1)		pair
African 6 RF	3	MCP	6 (1)
African 6 RF	3	PP	4 (2)	8 (1)
African 6 RF	3	PIP	0
African 6 RF	3	MP	4 (2)
African 6 RF	3	DIP	0
African 6 RF	3	DP	0
African 6 RF	3	Sole	0
African 6 RF	3	Interdigital	0
African 6 RF	4	CMc	8 (1)
African 6 RF	4	MC	3 (1)	8 (1)	4 (1)
African 6 RF	4	Ses	1 (1)	3 (1)			pair
African 6 RF	4	MCP	0
African 6 RF	4	PP	0
African 6 RF	4	PIP	0
African 6 RF	4	MP	0
African 6 RF	4	DIP	0
African 6 RF	4	DP	0
African 6 RF	4	Sole	0
African 6 RF	4	Interdigital	0
African 6 RF	5	CMc	6 (1)	1 (1)
African 6 RF	5	MC	3 (1)	8 (1)
African 6 RF	5	Ses	6 (1)	3 (1)			pair, lat bigger
African 6 RF	5	MCP	0
African 6 RF	5	PP	4 (1)
African 6 RF	5	PIP	0
African 6 RF	5	MP	0
African 6 RF	5	DIP	x
African 6 RF	5	DP	x
African 6 RF	5	Sole	0
African 6 RF	5	Interdigital	0
African 6 LH	1	CMc	0				tiny ossification of predigit
African 6 LH	1	MC	8 (1)	4 (1)
African 6 LH	1	Ses	0				single
African 6 LH	1	MCP	x
African 6 LH	1	PP	x
African 6 LH	1	PIP	x
African 6 LH	1	MP	x
African 6 LH	1	DIP	x
African 6 LH	1	DP	x
African 6 LH	1	Sole	0
African 6 LH	1	Interdigital	0
African 6 LH	2	CMc	0
African 6 LH	2	MC	3 (1)	8 (2)	4 (2)
African 6 LH	2	Ses	0				pair
African 6 LH	2	MCP	0
African 6 LH	2	PP	8 (1)	4 (1)
African 6 LH	2	PIP	0
African 6 LH	2	MP	0
African 6 LH	2	DIP	0
African 6 LH	2	DP	0
African 6 LH	2	Sole	0
African 6 LH	2	Interdigital	0
African 6 LH	3	CMc	3 (1)
African 6 LH	3	MC	3 (1)	8 (1)
African 6 LH	3	Ses	0				pair
African 6 LH	3	MCP	0
African 6 LH	3	PP	4 (2)	8 (1)
African 6 LH	3	PIP	0
African 6 LH	3	MP	4 (1)
African 6 LH	3	DIP	6 (1)
African 6 LH	3	DP	0
African 6 LH	3	Sole	0
African 6 LH	3	Interdigital	0
African 6 LH	4	CMc	3 (1)
African 6 LH	4	MC	3 (1)	8 (1)	4 (1)
African 6 LH	4	Ses	0				pair
African 6 LH	4	MCP	0
African 6 LH	4	PP	4 (2)	8 (1)
African 6 LH	4	PIP	0
African 6 LH	4	MP	4 (1)
African 6 LH	4	DIP	0
African 6 LH	4	DP	0
African 6 LH	4	Sole	0
African 6 LH	4	Interdigital	0
African 6 LH	5	CMc	0
African 6 LH	5	MC	8 (1)
African 6 LH	5	Ses	3 (1)	4 (1)			pair
African 6 LH	5	MCP	0
African 6 LH	5	PP	8 (1)
African 6 LH	5	PIP	0
African 6 LH	5	MP	0
African 6 LH	5	DIP	x
African 6 LH	5	DP	x
African 6 LH	5	Sole	0
African 6 LH	5	Interdigital	0
African 6 RH	1	CMc	6 (1)	4 (1)			predigit tiny multiple flecks
African 6 RH	1	MC	3 (2)	4 (2)	8 (2)	5?
African 6 RH	1	Ses	4 (2)	8 (2)			single
African 6 RH	1	MCP	x
African 6 RH	1	PP	x
African 6 RH	1	PIP	x
African 6 RH	1	MP	x
African 6 RH	1	DIP	x
African 6 RH	1	DP	x
African 6 RH	1	Sole	0
African 6 RH	1	Interdigital	0
African 6 RH	2	CMc	0
African 6 RH	2	MC	3 (1)	4 (2)
African 6 RH	2	Ses	1 (1)	4 (1)			pair
African 6 RH	2	MCP	6 (3)
African 6 RH	2	PP	8 (3)	4 (3)	2 (3)
African 6 RH	2	PIP	0
African 6 RH	2	MP	0
African 6 RH	2	DIP	0
African 6 RH	2	DP	0
African 6 RH	2	Sole	0
African 6 RH	2	Interdigital	0
African 6 RH	3	CMc	0
African 6 RH	3	MC	8 (1)
African 6 RH	3	Ses	4 (1)				pair
African 6 RH	3	MCP	6 (1)
African 6 RH	3	PP	4 (2)	8 (1)	3 (1)
African 6 RH	3	PIP	0
African 6 RH	3	MP	8 (1)
African 6 RH	3	DIP	0
African 6 RH	3	DP	0
African 6 RH	3	Sole	0
African 6 RH	3	Interdigital	0
African 6 RH	4	CMc	8 (1)
African 6 RH	4	MC	8 (1)	4 (1)
African 6 RH	4	Ses	8 (1)				pair
African 6 RH	4	MCP	6 (1)
African 6 RH	4	PP	4 (2)	8 (1)
African 6 RH	4	PIP	0
African 6 RH	4	MP	0
African 6 RH	4	DIP	0
African 6 RH	4	DP	0
African 6 RH	4	Sole	0
African 6 RH	4	Interdigital	0
African 6 RH	5	CMc	0
African 6 RH	5	MC	3 (1)	8 (1)
African 6 RH	5	Ses	4 (1)	8 (1)			pair
African 6 RH	5	MCP	0
African 6 RH	5	PP	8 (1)	3 (2)	1 (1)
African 6 RH	5	PIP	6 (1)
African 6 RH	5	MP	0
African 6 RH	5	DIP	x
African 6 RH	5	DP	x
African 6 RH	5	Sole	0
African 6 RH	5	Interdigital	0
African 6 LF	1	CMc	6 (1)				small predigit
African 6 LF	1	MC	8 (1)
African 6 LF	1	Ses	4 (1)				single
African 6 LF	1	MCP	6 (1)
African 6 LF	1	PP	0
African 6 LF	1	PIP	x
African 6 LF	1	MP	x
African 6 LF	1	DIP	x
African 6 LF	1	DP	x
African 6 LF	1	Sole	0
African 6 LF	1	Interdigital	0
African 6 LF	2	CMc	4 (1)	3 (1)
African 6 LF	2	MC	3 (1)	8 (1)
African 6 LF	2	Ses	0				pair
African 6 LF	2	MCP	0
African 6 LF	2	PP	3 (1)	8 (1)
African 6 LF	2	PIP	0
African 6 LF	2	MP	8 (1)	4 (1)
African 6 LF	2	DIP	0
African 6 LF	2	DP	0
African 6 LF	2	Sole	0
African 6 LF	2	Interdigital	0
African 6 LF	3	CMc	3 (1)	6 (1)
African 6 LF	3	MC	3 (2)	8 (1)
African 6 LF	3	Ses	4 (1)	8 (1)			pair
African 6 LF	3	MCP	6 (1)
African 6 LF	3	PP	4 (2)	8 (2)	3 (1)
African 6 LF	3	PIP	0
African 6 LF	3	MP	4 (2)	8 (2)
African 6 LF	3	DIP	0
African 6 LF	3	DP	0
African 6 LF	3	Sole	0
African 6 LF	3	Interdigital	0
African 6 LF	4	CMc	0
African 6 LF	4	MC	3 (1)	8 (1)
African 6 LF	4	Ses	8 (1)	4 (1)			pair
African 6 LF	4	MCP	6 (2)
African 6 LF	4	PP	4 (3)	8 (2)
African 6 LF	4	PIP	6 (1)
African 6 LF	4	MP	4 (1)
African 6 LF	4	DIP	0
African 6 LF	4	DP	0
African 6 LF	4	Sole	0
African 6 LF	4	Interdigital	0
African 6 LF	5	CMc	6 (2)	4 (1)	3 (1)
African 6 LF	5	MC	3 (1)	4 (1)
African 6 LF	5	Ses	3 (1)				pair lat bigger
African 6 LF	5	MCP	0
African 6 LF	5	PP	8 (1)
African 6 LF	5	PIP	0
African 6 LF	5	MP	0
African 6 LF	5	DIP	x
African 6 LF	5	DP	x
African 6 LF	5	Sole	0
African 6 LF	5	Interdigital	0
Asian 10 RH	1	CMc	6 (1)				no predigit
Asian 10 RH	1	MC	4 (2)	8 (2)	3 (1)
Asian 10 RH	1	Ses	0				single
Asian 10 RH	1	MCP	x
Asian 10 RH	1	PP	x
Asian 10 RH	1	PIP	x
Asian 10 RH	1	MP	x
Asian 10 RH	1	DIP	x
Asian 10 RH	1	DP	x
Asian 10 RH	1	Sole	0
Asian 10 RH	1	Interdigital	0
Asian 10 RH	2	CMc	6 (1)
Asian 10 RH	2	MC	8 (1)	3 (1)	4 (1)
Asian 10 RH	2	Ses	0				pair
Asian 10 RH	2	MCP	6 (1)
Asian 10 RH	2	PP	8 (1)
Asian 10 RH	2	PIP	0
Asian 10 RH	2	MP	0
Asian 10 RH	2	DIP	x
Asian 10 RH	2	DP	x
Asian 10 RH	2	Sole	0
Asian 10 RH	2	Interdigital	0
Asian 10 RH	3	CMc	6 (1)	3 (1)
Asian 10 RH	3	MC	3 (1)	8 (1)
Asian 10 RH	3	Ses	0				pair
Asian 10 RH	3	MCP	0
Asian 10 RH	3	PP	8 (1)	3 (1)
Asian 10 RH	3	PIP	0
Asian 10 RH	3	MP	4 (1)
Asian 10 RH	3	DIP	0
Asian 10 RH	3	DP	0
Asian 10 RH	3	Sole	0
Asian 10 RH	3	Interdigital	0
Asian 10 RH	4	CMc	4 (1)	3 (1)
Asian 10 RH	4	MC	3 (1)
Asian 10 RH	4	Ses	0				pair
Asian 10 RH	4	MCP	6 (1)
Asian 10 RH	4	PP	3 (2)	8 (1)
Asian 10 RH	4	PIP	0
Asian 10 RH	4	MP	4 (1)	8 (1)
Asian 10 RH	4	DIP	0
Asian 10 RH	4	DP	0
Asian 10 RH	4	Sole	0
Asian 10 RH	4	Interdigital	0
Asian 10 RH	5	CMc	6 (1)
Asian 10 RH	5	MC	8 (1)	3 (2)
Asian 10 RH	5	Ses	8 (2)	3 (1)	6 (1)		pair
Asian 10 RH	5	MCP	6 (1)
Asian 10 RH	5	PP	8 (2)
Asian 10 RH	5	PIP	0
Asian 10 RH	5	MP	0
Asian 10 RH	5	DIP	x
Asian 10 RH	5	DP	x
Asian 10 RH	5	Sole	0
Asian 10 RH	5	Interdigital	0
Asian 10 RF	1	CMc	6 (1)				predigit
Asian 10 RF	1	MC	8 (2)	3 (1)	4 (1)
Asian 10 RF	1	Ses	8 (1)	3 (1)			single
Asian 10 RF	1	MCP	6 (1)
Asian 10 RF	1	PP	8 (2)
Asian 10 RF	1	PIP	x
Asian 10 RF	1	MP	x
Asian 10 RF	1	DIP	x
Asian 10 RF	1	DP	0
Asian 10 RF	1	Sole	0
Asian 10 RF	1	Interdigital	0
Asian 10 RF	2	CMc	6 (3)	3 (2)	8 (2)
Asian 10 RF	2	MC	8 (2)	3 (1)
Asian 10 RF	2	Ses	4 (1)	8 (2)	3 (2)	6 (3)	fused
Asian 10 RF	2	MCP	6 (2)
Asian 10 RF	2	PP	8 (2)	3 (1)
Asian 10 RF	2	PIP	0
Asian 10 RF	2	MP	0
Asian 10 RF	2	DIP	0
Asian 10 RF	2	DP	8 (1)
Asian 10 RF	2	Sole	0
Asian 10 RF	2	Interdigital	0
Asian 10 RF	3	CMc	6 (2)	3 (2)	1 (1)
Asian 10 RF	3	MC	8 (1)	3 (1)
Asian 10 RF	3	Ses	6 (2)	8 (2)	3 (2)		fused
Asian 10 RF	3	MCP	6 (2)
Asian 10 RF	3	PP	8 (2)	3 (2)
Asian 10 RF	3	PIP	0
Asian 10 RF	3	MP	8 (2)
Asian 10 RF	3	DIP	0
Asian 10 RF	3	DP	8 (2)	4 (2)
Asian 10 RF	3	Sole	0
Asian 10 RF	3	Interdigital	0
Asian 10 RF	4	CMc	6 (3)	4 (3)	3 (3)	8 (3)
Asian 10 RF	4	MC	8 (2)	3 (2)
Asian 10 RF	4	Ses	6 (2)	3 (2)			fused
Asian 10 RF	4	MCP	6 (1)
Asian 10 RF	4	PP	8 (2)	3 (2)	1 (1)
Asian 10 RF	4	PIP	6 (2)	8 (2)
Asian 10 RF	4	MP	8 (2)
Asian 10 RF	4	DIP	0
Asian 10 RF	4	DP	5	8 (3)
Asian 10 RF	4	Sole	0
Asian 10 RF	4	Interdigital	0
Asian 10 RF	5	CMc	6 (3)	4 (2)	3 (2)
Asian 10 RF	5	MC	3 (2)	8 (2)
Asian 10 RF	5	Ses	4 (1)	3 (2)	8 (2)	1 (1)	fused
Asian 10 RF	5	MCP	6 (1)
Asian 10 RF	5	PP	8 (2)
Asian 10 RF	5	PIP	0
Asian 10 RF	5	MP	0
Asian 10 RF	5	DIP	0
Asian 10 RF	5	DP	5	8 (2)
Asian 10 RF	5	Sole	0
Asian 10 RF	5	Interdigital	0
African 3 RH	1	CMc	0				small predigit
African 3 RH	1	MC	0
African 3 RH	1	Ses	0				single
African 3 RH	1	MCP	x
African 3 RH	1	PP	x
African 3 RH	1	PIP	x
African 3 RH	1	MP	x
African 3 RH	1	DIP	x
African 3 RH	1	DP	x
African 3 RH	1	Sole	0
African 3 RH	1	Interdigital	0
African 3 RH	2	CMc	8 (3)	6 (3)	4 (2)	3 (2)
African 3 RH	2	MC	3 (3)	8 (3)	1 (2)
African 3 RH	2	Ses	0				pair
African 3 RH	2	MCP	0
African 3 RH	2	PP	0
African 3 RH	2	PIP	0
African 3 RH	2	MP	0
African 3 RH	2	DIP	0
African 3 RH	2	DP	0				v small
African 3 RH	2	Sole	0
African 3 RH	2	Interdigital	0
African 3 RH	3	CMc	6 (3)	8 (3)	1 (3)	3 (3)
African 3 RH	3	MC	8 (3)	3 (3)	1 (3)	2 (3)
African 3 RH	3	Ses	8 (1)	3 (1)			fused
African 3 RH	3	MCP	7 (3)	6 (3)
African 3 RH	3	PP	2 (2)	8 (2)	1 (2)
African 3 RH	3	PIP	0
African 3 RH	3	MP	0
African 3 RH	3	DIP	0
African 3 RH	3	DP	0
African 3 RH	3	Sole	0
African 3 RH	3	Interdigital	1 (3)
African 3 RH	4	CMc	4 (2)	6 (2)	3 (2)	8 (2)
African 3 RH	4	MC	3 (2)	8 (2)	1 (2)	2 (2)
African 3 RH	4	Ses	4 (1)	8 (1)			fused
African 3 RH	4	MCP	7 (2)
African 3 RH	4	PP	6 (2)
African 3 RH	4	PIP	0
African 3 RH	4	MP	8 (1)
African 3 RH	4	DIP	0
African 3 RH	4	DP	0
African 3 RH	4	Sole	0
African 3 RH	4	Interdigital	0
African 3 RH	5	CMc	4 (3)	6 (2)
African 3 RH	5	MC	8 (2)	3 (2)
African 3 RH	5	Ses	3 (1)				pair
African 3 RH	5	MCP	6 (1)
African 3 RH	5	PP	8 (1)
African 3 RH	5	PIP	0
African 3 RH	5	MP	0
African 3 RH	5	DIP	x
African 3 RH	5	DP	x
African 3 RH	5	Sole	10				solar soft tissue defect across whole heel
African 3 RH	5	Interdigital	0
African 1 RF	1	CMc	6 (1)				basically unossified PD
African 1 RF	1	MC	3 (1)	8 (1)
African 1 RF	1	Ses	0				single
African 1 RF	1	MCP	0
African 1 RF	1	PP	0
African 1 RF	1	PIP	x
African 1 RF	1	MP	x
African 1 RF	1	DIP	x
African 1 RF	1	DP	x
African 1 RF	1	Sole	0
African 1 RF	1	Interdigital	0
African 1 RF	2	CMc	0
African 1 RF	2	MC	3 (1)
African 1 RF	2	Ses	0				pair
African 1 RF	2	MCP	0
African 1 RF	2	PP	8 (1)
African 1 RF	2	PIP	0
African 1 RF	2	MP	0
African 1 RF	2	DIP	0
African 1 RF	2	DP	0
African 1 RF	2	Sole	0
African 1 RF	2	Interdigital	0
African 1 RF	3	CMc	0
African 1 RF	3	MC	3 (1)	8 (1)
African 1 RF	3	Ses	0				pair
African 1 RF	3	MCP	6 (1)
African 1 RF	3	PP	3 (1)
African 1 RF	3	PIP	0
African 1 RF	3	MP	0
African 1 RF	3	DIP	0
African 1 RF	3	DP	0
African 1 RF	3	Sole	0
African 1 RF	3	Interdigital	0
African 1 RF	4	CMc	0
African 1 RF	4	MC	3 (1)	8 (1)
African 1 RF	4	Ses	0				pair
African 1 RF	4	MCP	0
African 1 RF	4	PP	3 (1)
African 1 RF	4	PIP	0
African 1 RF	4	MP	0
African 1 RF	4	DIP	0
African 1 RF	4	DP	0
African 1 RF	4	Sole	0
African 1 RF	4	Interdigital	0
African 1 RF	5	CMc	0
African 1 RF	5	MC	0
African 1 RF	5	Ses	0				pair lat bigger
African 1 RF	5	MCP	0
African 1 RF	5	PP	0
African 1 RF	5	PIP	0
African 1 RF	5	MP	0
African 1 RF	5	DIP	x
African 1 RF	5	DP	x
African 1 RF	5	Sole	0
African 1 RF	5	Interdigital	0
African 1 LH	1	CMc	1 (1)				no predigit
African 1 LH	1	MC	0
African 1 LH	1	Ses	0				single
African 1 LH	1	MCP	x
African 1 LH	1	PP	x
African 1 LH	1	PIP	x
African 1 LH	1	MP	x
African 1 LH	1	DIP	x
African 1 LH	1	DP	x
African 1 LH	1	Sole	0
African 1 LH	1	Interdigital	0
African 1 LH	2	CMc	8 (1)
African 1 LH	2	MC	0
African 1 LH	2	Ses	0				pair
African 1 LH	2	MCP	0
African 1 LH	2	PP	0
African 1 LH	2	PIP	0
African 1 LH	2	MP	0
African 1 LH	2	DIP	x
African 1 LH	2	DP	x
African 1 LH	2	Sole	0
African 1 LH	2	Interdigital	0
African 1 LH	3	CMc	8 (1)
African 1 LH	3	MC	3 (1)
African 1 LH	3	Ses	0				pair
African 1 LH	3	MCP	0
African 1 LH	3	PP	3 (1)
African 1 LH	3	PIP	0
African 1 LH	3	MP	0
African 1 LH	3	DIP	0
African 1 LH	3	DP	0
African 1 LH	3	Sole	0
African 1 LH	3	Interdigital	0
African 1 LH	4	CMc	0
African 1 LH	4	MC	4 (1)
African 1 LH	4	Ses	0				pair
African 1 LH	4	MCP	3 (1)
African 1 LH	4	PP	0
African 1 LH	4	PIP	0
African 1 LH	4	MP	0
African 1 LH	4	DIP	0
African 1 LH	4	DP	0
African 1 LH	4	Sole	0
African 1 LH	4	Interdigital	0
African 1 LH	5	CMc	6 (1)
African 1 LH	5	MC	3 (2)
African 1 LH	5	Ses	0				pair
African 1 LH	5	MCP	0
African 1 LH	5	PP	8 (1)
African 1 LH	5	PIP	0
African 1 LH	5	MP	0
African 1 LH	5	DIP	x
African 1 LH	5	DP	x
African 1 LH	5	Sole	0
African 1 LH	5	Interdigital	0
African 1 RH	1	CMc	0				no predigit
African 1 RH	1	MC	8 (1)
African 1 RH	1	Ses	0				single
African 1 RH	1	MCP	x
African 1 RH	1	PP	x
African 1 RH	1	PIP	x
African 1 RH	1	MP	x
African 1 RH	1	DIP	x
African 1 RH	1	DP	x
African 1 RH	1	Sole	0
African 1 RH	1	Interdigital	0
African 1 RH	2	CMc	0
African 1 RH	2	MC	3 (1)
African 1 RH	2	Ses	0				pair
African 1 RH	2	MCP	0
African 1 RH	2	PP	0
African 1 RH	2	PIP	0
African 1 RH	2	MP	0
African 1 RH	2	DIP	x
African 1 RH	2	DP	x
African 1 RH	2	Sole	0
African 1 RH	2	Interdigital	0
African 1 RH	3	CMc	0
African 1 RH	3	MC	0
African 1 RH	3	Ses	0				pair
African 1 RH	3	MCP	0
African 1 RH	3	PP	8 (1)
African 1 RH	3	PIP	0
African 1 RH	3	MP	0
African 1 RH	3	DIP	0
African 1 RH	3	DP	0
African 1 RH	3	Sole	0
African 1 RH	3	Interdigital	0
African 1 RH	4	CMc	0
African 1 RH	4	MC	3 (1)
African 1 RH	4	Ses	0				pair
African 1 RH	4	MCP	0
African 1 RH	4	PP	3 (1)
African 1 RH	4	PIP	0
African 1 RH	4	MP	0
African 1 RH	4	DIP	0
African 1 RH	4	DP	0
African 1 RH	4	Sole	0
African 1 RH	4	Interdigital	0
African 1 RH	5	CMc	3 (1)
African 1 RH	5	MC	3 (1)
African 1 RH	5	Ses	0				pair lat larger
African 1 RH	5	MCP	0
African 1 RH	5	PP	4 (1)
African 1 RH	5	PIP	0
African 1 RH	5	MP	0
African 1 RH	5	DIP	x
African 1 RH	5	DP	x
African 1 RH	5	Sole	0
African 1 RH	5	Interdigital	0
African 1 LF	1	CMc	0				no predigit
African 1 LF	1	MC	8 (1)
African 1 LF	1	Ses	0				fused
African 1 LF	1	MCP	0
African 1 LF	1	PP	0
African 1 LF	1	PIP	x
African 1 LF	1	MP	x
African 1 LF	1	DIP	x
African 1 LF	1	DP	x
African 1 LF	1	Sole	0
African 1 LF	1	Interdigital	0
African 1 LF	2	CMc	0
African 1 LF	2	MC	3 (1)
African 1 LF	2	Ses	0				pair
African 1 LF	2	MCP	0
African 1 LF	2	PP	0
African 1 LF	2	PIP	0
African 1 LF	2	MP	0
African 1 LF	2	DIP	0
African 1 LF	2	DP	0
African 1 LF	2	Sole	0
African 1 LF	2	Interdigital	0
African 1 LF	3	CMc	4 (2)	3 (1)
African 1 LF	3	MC	3 (2)
African 1 LF	3	Ses	0				pair
African 1 LF	3	MCP	6 (1)
African 1 LF	3	PP	6 (1)	4 (1)	8 (1)
African 1 LF	3	PIP	0
African 1 LF	3	MP	0
African 1 LF	3	DIP	0
African 1 LF	3	DP	0
African 1 LF	3	Sole	0
African 1 LF	3	Interdigital	0
African 1 LF	4	CMc	0
African 1 LF	4	MC	8 (1)	3 (1)
African 1 LF	4	Ses	3 (1)				pair
African 1 LF	4	MCP	6 (1)
African 1 LF	4	PP	0
African 1 LF	4	PIP	0
African 1 LF	4	MP	0
African 1 LF	4	DIP	0
African 1 LF	4	DP	0
African 1 LF	4	Sole	0
African 1 LF	4	Interdigital	0
African 1 LF	5	CMc	3 (1)
African 1 LF	5	MC	3 (1)	8 (1)
African 1 LF	5	Ses	8 (1)				pair
African 1 LF	5	MCP	0
African 1 LF	5	PP	0
African 1 LF	5	PIP	0
African 1 LF	5	MP	0
African 1 LF	5	DIP	x
African 1 LF	5	DP	x
African 1 LF	5	Sole	0
African 1 LF	5	Interdigital	0
Asian 6 RF	1	CMc	6 (1)				predigit
Asian 6 RF	1	MC	3 (1)	8 (1)
Asian 6 RF	1	Ses	0				single
Asian 6 RF	1	MCP	0
Asian 6 RF	1	PP	8 (1)
Asian 6 RF	1	PIP	x
Asian 6 RF	1	MP	x
Asian 6 RF	1	DIP	x
Asian 6 RF	1	DP	0
Asian 6 RF	1	Sole	0
Asian 6 RF	1	Interdigital	0
Asian 6 RF	2	CMc	6 (1)	3 (1)
Asian 6 RF	2	MC	3 (1)	8 (1)
Asian 6 RF	2	Ses	3 (1)				pair
Asian 6 RF	2	MCP	0
Asian 6 RF	2	PP	3 (1)	8 (1)
Asian 6 RF	2	PIP	0
Asian 6 RF	2	MP	8 (1)
Asian 6 RF	2	DIP	0
Asian 6 RF	2	DP	8 (1)
Asian 6 RF	2	Sole	0
Asian 6 RF	2	Interdigital	0
Asian 6 RF	3	CMc	0
Asian 6 RF	3	MC	3 (1)	8 (1)
Asian 6 RF	3	Ses	0				pair
Asian 6 RF	3	MCP	0
Asian 6 RF	3	PP	8 (1)	3 (1)
Asian 6 RF	3	PIP	0
Asian 6 RF	3	MP	8 (1)
Asian 6 RF	3	DIP	0
Asian 6 RF	3	DP	8 (2)
Asian 6 RF	3	Sole	0
Asian 6 RF	3	Interdigital	0
Asian 6 RF	4	CMc	0
Asian 6 RF	4	MC	3 (1)	8 (1)
Asian 6 RF	4	Ses	3 (1)				pair
Asian 6 RF	4	MCP	0
Asian 6 RF	4	PP	8 (1)	3 (1)
Asian 6 RF	4	PIP	0
Asian 6 RF	4	MP	8 (1)
Asian 6 RF	4	DIP	0
Asian 6 RF	4	DP	8 (1)
Asian 6 RF	4	Sole	0
Asian 6 RF	4	Interdigital	0
Asian 6 RF	5	CMc	6 (1)	3 (1)	8 (1)
Asian 6 RF	5	MC	3 (2)	8 (1)
Asian 6 RF	5	Ses	3 (2)	8 (1)		pair
Asian 6 RF	5	MCP	6 (1)
Asian 6 RF	5	PP	3 (1)	8 (1)
Asian 6 RF	5	PIP	0
Asian 6 RF	5	MP	8 (1)
Asian 6 RF	5	DIP	0
Asian 6 RF	5	DP	0
Asian 6 RF	5	Sole	0
Asian 6 RF	5	Interdigital	0
Asian 6 LF	1	CMc	0				predigit
Asian 6 LF	1	MC	3 (1)
Asian 6 LF	1	Ses	3 (1)			single
Asian 6 LF	1	MCP	0
Asian 6 LF	1	PP	8 (1)
Asian 6 LF	1	PIP	x
Asian 6 LF	1	MP	x
Asian 6 LF	1	DIP	x
Asian 6 LF	1	DP	0
Asian 6 LF	1	Sole	0
Asian 6 LF	1	Interdigital	0
Asian 6 LF	2	CMc	6 (1)
Asian 6 LF	2	MC	3 (1)	8 (1)
Asian 6 LF	2	Ses	0			pair
Asian 6 LF	2	MCP	0
Asian 6 LF	2	PP	3 (1)	8 (1)
Asian 6 LF	2	PIP	0
Asian 6 LF	2	MP	8 (1)
Asian 6 LF	2	DIP	0
Asian 6 LF	2	DP	0
Asian 6 LF	2	Sole	0
Asian 6 LF	2	Interdigital	0
Asian 6 LF	3	CMc	6 (1)	8 (1)
Asian 6 LF	3	MC	3 (1)	8 (1)
Asian 6 LF	3	Ses	0			pair
Asian 6 LF	3	MCP	6 (1)
Asian 6 LF	3	PP	3 (2)	8 (1)
Asian 6 LF	3	PIP	0
Asian 6 LF	3	MP	0
Asian 6 LF	3	DIP	0
Asian 6 LF	3	DP	8 (1)
Asian 6 LF	3	Sole	0
Asian 6 LF	3	Interdigital	0
Asian 6 LF	4	CMc	6 (1)
Asian 6 LF	4	MC	3 (1)	8 (1)
Asian 6 LF	4	Ses	3 (1)			pair
Asian 6 LF	4	MCP	0
Asian 6 LF	4	PP	3 (2)	8 (1)
Asian 6 LF	4	PIP	0
Asian 6 LF	4	MP	0
Asian 6 LF	4	DIP	0
Asian 6 LF	4	DP	8 (1)
Asian 6 LF	4	Sole	0
Asian 6 LF	4	Interdigital	0
Asian 6 LF	5	CMc	6 (1)	3 (1)
Asian 6 LF	5	MC	1 (1)	3 (1)	8 (1)
Asian 6 LF	5	Ses	4 (2)	3 (1)	8 (1)	pair
Asian 6 LF	5	MCP	0
Asian 6 LF	5	PP	3 (1)	8 (1)
Asian 6 LF	5	PIP	0
Asian 6 LF	5	MP	8 (1)
Asian 6 LF	5	DIP	0
Asian 6 LF	5	DP	5
Asian 6 LF	5	Sole	0
Asian 6 LF	5	Interdigital	0
Asian 3 RH	1	CMc	0				predigit
Asian 3 RH	1	MC	8 (1)
Asian 3 RH	1	Ses	8 (1)			single, small, v near to predigit
Asian 3 RH	1	MCP	x
Asian 3 RH	1	PP	x
Asian 3 RH	1	PIP	x
Asian 3 RH	1	MP	x
Asian 3 RH	1	DIP	x
Asian 3 RH	1	DP	x
Asian 3 RH	1	Sole	0
Asian 3 RH	1	Interdigital	0
Asian 3 RH	2	CMc	6 (2)	4 (3)	3 (1)
Asian 3 RH	2	MC	8 (1)
Asian 3 RH	2	Ses	4 (1)			fused
Asian 3 RH	2	MCP	0
Asian 3 RH	2	PP	8 (1)
Asian 3 RH	2	PIP	x
Asian 3 RH	2	MP	x
Asian 3 RH	2	DIP	x
Asian 3 RH	2	DP	0			articulates with PP
Asian 3 RH	2	Sole	0
Asian 3 RH	2	Interdigital	0
Asian 3 RH	3	CMc	6 (2)	4 (3)	3 (1)
Asian 3 RH	3	MC	3 (1)
Asian 3 RH	3	Ses	3 (1)			fused
Asian 3 RH	3	MCP	6 (1)
Asian 3 RH	3	PP	0
Asian 3 RH	3	PIP	0
Asian 3 RH	3	MP	0
Asian 3 RH	3	DIP	0
Asian 3 RH	3	DP	0
Asian 3 RH	3	Sole	0
Asian 3 RH	3	Interdigital	0
Asian 3 RH	4	CMc	6 (1)	4 (2)	3 (1)
Asian 3 RH	4	MC	3 (1)	8 (1)
Asian 3 RH	4	Ses	0			fused
Asian 3 RH	4	MCP	0
Asian 3 RH	4	PP	3 (2)	8 (1)
Asian 3 RH	4	PIP	0
Asian 3 RH	4	MP	8 (2)			small misshapen
Asian 3 RH	4	DIP	0
Asian 3 RH	4	DP	0
Asian 3 RH	4	Sole	0
Asian 3 RH	4	Interdigital	0
Asian 3 RH	5	CMc	6 (3)	3 (2)	8 (2)
Asian 3 RH	5	MC	3 (2)	8 (2)	4 (1)
Asian 3 RH	5	Ses	3 (1)	8 (1)		fused
Asian 3 RH	5	MCP	6 (2)
Asian 3 RH	5	PP	3 (1)	8 (1)
Asian 3 RH	5	PIP	0
Asian 3 RH	5	MP	0
Asian 3 RH	5	DIP	0
Asian 3 RH	5	DP	0			small
Asian 3 RH	5	Sole	0
Asian 3 RH	5	Interdigital	0
Asian 3 RF	1	CMc	0				predigit
Asian 3 RF	1	MC	8 (1)
Asian 3 RF	1	Ses	0			paired extremely tiny
Asian 3 RF	1	MCP	8 (1)
Asian 3 RF	1	PP	x
Asian 3 RF	1	PIP	x
Asian 3 RF	1	MP	x
Asian 3 RF	1	DIP	x
Asian 3 RF	1	DP	x
Asian 3 RF	1	Sole	0
Asian 3 RF	1	Interdigital	0
Asian 3 RF	2	CMc	6 (2)	8 (1)	3 (1)
Asian 3 RF	2	MC	3 (1)	8 (1)
Asian 3 RF	2	Ses	8 (1)	3 (2)			fused
Asian 3 RF	2	MCP	0
Asian 3 RF	2	PP	8 (1)	3 (2)
Asian 3 RF	2	PIP	0
Asian 3 RF	2	MP	8 (1)	3 (1)
Asian 3 RF	2	DIP	0
[truncated: 861 more rows]

## Sheet: summarised data
Anon	No. feet	Death reason	Gender	Age	Species	RF no. dx	LF no. dx	RH no. dx	LH no. dx		RF no. lesions	LF no. lesions	RH no. lesions	LH no. lesions		RF no. PD	LF no. PD	RH no. PD	LH no. PD
Af1	4	?	M	19	Af	0	2	0	1		0	2	0	1		0	0	0	0
Af2	4	euthanasia due to reproductive issues	F	24	Af	1	2	1	0		1	2	1	0		2	2	1	1
Af3	1	?	M	27	Af			7					35					1
Af4	1	Disease ("infection associated, digestive, mechanical abnormality")	M	28	Af	1					1					0
Af5	1	?	F	30	Af		5					32					0
Af6	4	suspcted cardiac issues	F	32	Af	2	4	5	2		6	9	13	4		1	1	1	1
Af7	2	Disease (unspecified)	M	32	Af	0	3				0	8				0	0
As1	2	?	M	17	As	3	0				3	0				0	0
As2	1	euthanasia due to stiff foreleg	M	17	As			6					21					3
As3	4	euthanasia due to arthritis/aggression?	F	26	As	4	3	4	1		14	19	12	2		3	3	3	3
As4	3	?	F	40	As	5	5	8			27	15	55			0	0	3
As5	4	Euthanasia due to foot abscess	F	35	As	3	3	2	4		16	4	7	18		0	0	2	2
As6	2	?	M	40	As	2	2				3	3				2	2
As7	1	euthanasia due to chronic arthritis	F	40	As	6					14					2
As8	3	?	F	42	As	7		4	4		23		18	37		1		3	3
As9	2	Died of osteomyelitis and foot problems	F	52	As			4	8				11	22				3	3
As10	2	Euthanasia due to non-specified sickness	M	50	As	4		3			45		6			3		0
As11	1	euthanised	F	50	As			2					7					0
As12	4	euthanised	F	55	As	5	5	5	5		33	21	11	19		3	3	3	3
As13	2	Sudden collapse	F	61	As	8			6		32			17		2			3
As14	4	?	?	?	As	7	7	4	4		35	44	13	12		3	3	3	3
SESAMOIDS	foot	age	gender	Digit I	Digit II	Digit III	Digit IV	Digit 5
Af1 LF	Fore	19	M	fused	pair	pair	pair	pair
Af1 RF	Fore	19	M	single	pair	pair	pair	pair	In digit V, lateral noted as larger
Af1 LH	Hind	19	M	single	pair	pair	pair	pair
Af1 RH	Hind	19	M	single	pair	pair	pair	pair	In digit V, lateral noted as larger
Af2 LF	Fore	24	F	fused	pair	pair	pair	pair
Af2 RF	Fore	24	F	single	pair	pair	pair	pair
Af2 LH	Hind	24	F	single	pair	pair	pair	pair
Af2 RH	Hind	24	F	single	pair	pair	pair	pair
Af3 RH	Hind	27	M	single	pair	fused	fused	pair
Af4 RF	Fore	28	M	single	pair	pair	pair	fused
Af5 LF	Fore	30	F	single	pair	pair	pair	pair
Af6 LF	Fore	32	F	single	pair	pair	pair	pair	In digit V, lateral noted as larger
Af6 RF	Fore	32	F	single	pair	pair	pair	pair	In digit V, lateral noted as larger
Af7 LF	Fore	32	M	single	pair	pair	pair	pair	In digit V, lateral noted as larger
Af7 RF	Fore	32	M	single	pair	pair	pair	pair	In digit V, lateral noted as larger
Af6 LH	Hind	32	F	single	pair	pair	pair	pair
Af6 RH	Hind	32	F	single	pair	pair	pair	pair
As1 LF	Fore	17	M	single	pair	pair	pair	fused
As1 RF	Fore	17	M	single	pair	pair	pair	fused	In digit I, noted as small
As2 RH	Hind	17	M	x	pair	fused	fused	pair
As3 LF	Fore	26	F	single	fused	fused	fused	fused
As3 RF	Fore	26	F	pair	fused	fused	pair	fused	In digit I, extremely tiny
As3 LH	Hind	26	F	x	fused	fused	fused	fused	In digit I, poss fused with predigit?
As3 RH	Hind	26	F	single	fused	fused	fused	fused	In digit I, small and v near to predigit
As5 LF	Fore	35	F	single	fused	fused	pair	fused
As5 RF	Fore	35	F	single	fused	fused	pair	fused
As5 LH	Hind	35	F	single	fused	fused	fused	pair
As5 RH	Hind	35	F	fused	fused	fused	fused	pair
As4 RF	Fore	40	F	single	pair	pair	pair	fused
As7 RF	Fore	40	F	single	fused	fused	fused	pair
As6 LF	Fore	40	M	single	pair	pair	pair	pair
As6 RF	Fore	40	M	single	pair	pair	pair	pair
As4 LF	Fore	40	F	single	fused	pair	x	single
As4 RH	Hind	40	F	x	fused	fused	fused	pair
As8 RF	Fore	42	F	single	fused	fused	fused	fused
As8 LH	Hind	42	F	x	fused	fused	fused	pair
As8 RH	Hind	42	F	x	pair	fused	fused	pair
As10 RF	Fore	50	M	single	fused	fused	fused	fused
As11 RH	Hind	50	F	x	pair	pair	pair	pair
As10 RH	Hind	50	M	single	pair	pair	pair	pair
As9 LH	Hind	52	F	single	fused	?	fused	pair	In digit III, unclear due to bone lysis
As9 RH	Hind	52	F	single	pair	fused	fused	pair	In digit I, noted as small
As12 LF	Fore	55	F	single	fused	fused	fused	pair
As12 RF	Fore	55	F	single	fused	fused	fused	pair
As12 LH	Hind	55	F	single	fused	fused	fused	pair	In digit V, lateral noted as larger
As12 RH	Hind	55	F	single	single	fused	fused	pair
As13 RF	Fore	61	F	single	fused	fused	fused	fused
As13 LH	Hind	61	F	x	pair	fused	fused	pair
As14 LF	Fore	?	?	single	fused	fused	fused	pair
As14 RF	Fore	?	?	single	fused	fused	fused	pair
As14 RH	Hind	?	?	single	fused	fused	fused	pair
As14 LH	Hind	?	?	single	pair	fused	fused	pair	In digit V, lateral noted as larger
Grade 2+ Pathology
	1 Calcification	2 Osteitis	3 Enthesiophyte	4 Cyst	5 Fracture	6 DJD	7 Infectious OA	8 Remodelling	9 Subluxation	11 misc
Af5 LF	4	0	6	6		7	0	9	0
As13 LH	3	0	5	3	1	1	0	4	0
As13 RF	1	0	7	6		6	1	8	1	2
Af7 RF	0	0	0	0		0	0	0	0
Af7 LF	0	0	2	3		0	0	3	0
As4 LF	0	1	4	3		3	0	4	0
As4 RF	9	0	7	3		4	0	4	0
As4 RH	6	5	10	11		9	2	12	1
Af4 RF	0	0	0	0		0	0	0	0	1
As12 LF	1	0	6	0		3	0	9	2
As12 LH	4	0	5	0		1	0	8	1
As12 RF	2	0	13	2		3	0	13	0
As12 RH	2	0	2	1		0	0	5	1
As9 LH	6	1	3	2		2	1	6	1
As9 RH	0	0	3	0		3	0	4	1
As1 RF	0	0	0	1		0	0	1	1
As1 LF	0	0	0	0		0	0	0	0
As2 RH	2	0	8	1	1	1	0	8	0
As11 RH	0	0	0	3		0	0	4	0
As14 LF	3	4	9	5		6	3	14	0
As14 LH	0	0	3	3		1	0	5	0
As14 RF	3	2	7	4		6	2	11	0
As14 RH	0	0	1	7		1	0	4	0
As8 LH	0	0	12	6		7	0	12	0
As8 RF	3	2	7	2		3	1	5	0
As8 RH	0	0	4	4		3	0	7	0
As7 RF	0	2	4	1		1	1	5	0
As5 LF	0	0	2	0		1	0	1	0
As5 LH	0	0	9	1		2	0	6	0
As5 RF	0	0	9	1		0	0	6	0
As5 RH	0	0	4	0		0	0	3	0
As3 LF	0	0	8	2		0	0	9	0
As3 LH	0	0	0	0		0	0	2	0
As3 RF	0	0	8	1		1	0	4	0
As3 RH	0	0	3	3		4	0	2	0
As6 LF	0	0	2	1		0	0	0	0
As6 RF	0	0	2	0		0	0	1	0
Af1 LF	0	0	1	1		0	0	0	0
Af1 LH	0	0	1	0		0	0	0	0
Af1 RF	0	0	0	0		0	0	0	0
Af1 RH	0	0	0	0		0	0	0	0
Af3 RH	6	3	7	3		6	2	8	0
As10 RF	0	0	12	3		10	0	20	0
As10 RH	0	0	2	1		0	0	3	0
Af6 LF	0	0	1	3		2	0	3	0
Af6 LH	0	0	0	3		0	0	1	0
Af6 RF	0	0	1	5		0	0	0	0
Af6 RH	0	1	2	6		1	0	3	0
Af2 RH	0	0	0	1		0	0	0	0
Af2 RF	0	0	1	0		0	0	0	0
Af2 LF	0	0	1	1		0	0	0	0
Af2 LH	0	0	0	0		0	0	0	0
Totals:	55	21	204	113	2	98	13	237	9	3
755

## Sheet: phalangeal data
Misshapen	species	age	foot	I	II	III	IV	V	Missing	Elephant	No. feet	foot	Age	Species	I	II	III	IV	V
As3 LF	As	26	F				MP			Af1	RF	F	19	Af	MP + DP				DP
As3 RF	As	26	F		MP					Af1	LF	F	19	Af	MP + DP				DP
As1 RF	As	17	F				MP			Af2	RF	F	24	Af	MP + DP				DP
Af7 RF	Af	32	F		MP					Af2	LF	F	24	Af	MP + DP				DP
As13 RF	As		F				MP			Af4	RF	F	28	Af	MP + DP				DP
As11	As	50	H	MP						Af6	RF	F	30	Af	MP + DP				DP
As14 LH	As		H		MP					Af6	LF	F	30	Af	MP + DP				DP
As14 RH	As		H		MP					Af7	RF	F	32	Af	MP + DP				DP
As8 LH	As	42	H		MP		MP			Af7	LF	F	32	Af	MP + DP	DP			DP
As8 RH	As	42	H		MP					Af1	RH	H	19	Af	All	DP			DP
As5 RH	As	35	H	PP + MP			MP			Af1	LH	H	19	Af	All	DP			DP
As3 LH	As	26	H				MP			Af2	RH	H	24	Af	All				DP
As3 RH	As	26	H				MP			Af2	LH	H	24	Af	All	DP			DP
As2 RH	As	18	H		MP		MP	MP		Af3	RH	H	27	Af	All				DP
As12 LH	As	55	H		MP		MP			Af6	RH	H	30	Af	All				DP
As4 RH	As	35	H		MP		MP			Af6	LH	H	30	Af	All				DP
As13 LH	As		H				MP	DP		As3	RF	F	26	As	All				MP
										As3	LF	F	26	As	MP				MP
										As6	RF	F	39	As	MP
										As6	LF	F	39	As	MP
Abaxial surface shorter or missing			17							As10	RF	F	50	As	MP
Rounded			5							As12	RF	F	55	As	MP
scalloped			2							As12	LF	F	55	As	MP
										As14	RF	F		As	MP			DP	MP
										As14	LF	F		As	MP		DP		MP
										As1	RF	F	17	As	MP + DP
										As1	LF	F	17	As	MP + DP
										As4	RF	F	35	As	MP + DP
										As4	LF	F	35	As	MP + DP			All + ses
										As5	RF	F	35	As	MP + DP			DP
										As5	LF	F	35	As	MP + DP			DP
										As7	RF	F	40	As	MP + DP
										As8	RF	F	42	As	MP + DP			DP
										As13	RF	F		As	MP + DP				MP
										As3	RH	H	26	As	All	MP
										As10	RH	H	50	As	All	DP			DP
										As12	RH	H	55	As	All
										As12	LH	H	55	As	All
										As14	RH	H		As	All				MP
										As14	LH	H		As	All				MP
										As3	LH	H	26	As	All + ses				MP
										As4	RH	H	35	As	All + ses				MP + DP
										As11	RH	H	50	As	All + ses				MP
										As13	LH	H		As	All + ses				MP
										As5	RH	H	35	As	DP				MP
										As9	RH	H	50	As	DP				MP
										As5	LH	H	35	As	MP + DP				MP
										As9	LH	H	50	As	MP + DP				MP
										As8	RH	H	42	As	MP + DP + ses				MP
										As8	LH	H	42	As	MP + DP + ses				MP
